# Supplementary material for: How gap distance between gold nanoparticles in dimers and trimers on metallic and non-metallic SERS substrates can impact signal enhancement
Source: Royal Society of Chemistry journal article supplement (doi:10.1039/d1na00114k), 2021-11-12
Supplement: d1na00114k1.pdf [file d1na00114k1.pdf]

Supplementary Materials

## How gap distance between gold nanoparticles in dimers and trimers on metallic and non-metallic SERS substrates can impact signal enhancement

Arbuz Alexander, Alisher Sultangaziyev, Alisher Rapikov, Zhanar Kunushpayeva and Rostislav Bukasov

Table S1. Results for AuNPs on the surface of Au substrate

| Au  | Id/Is | St. E | EFd/EF <sub>s</sub> | St. E | Dimers # | Int Dimers | Monomers # | Int Monomers |
|-----|-------|-------|---------------------|-------|----------|------------|------------|--------------|
| C6  | 9,0   | 1,5   | 4,0                 | 0,6   | 21       | 456,8      | 17         | 50,7         |
| C4  | 6,8   | 1,1   | 2,7                 | 0,5   | 14       | 415,1      | 14         | 61,2         |
| C8  | 5,4   | 0,6   | 2,4                 | 0,3   | 24       | 476,1      | 29         | 88,8         |
| C12 | 2,4   | 0,3   | 1,2                 | 0,2   | 26       | 70,1       | 24         | 28,7         |
| C16 | 1,7   | 0,1   | 0,8                 | 0,1   | 18       | 53,5       | 20         | 30,3         |

Id/Is - dimer intensity/monomer intensity, Int - Raman Intensity, EF - enhancement factor, St. E - standard error.

Table S2. Results for AuNPs on the surface of Al substrate

| Al  | Id/Is | StE | EF  | StE in EF | Dimers # | Int Dimers | Monomers # | Int Monomers |
|-----|-------|-----|-----|-----------|----------|------------|------------|--------------|
| C4  | 3,8   | 0,9 | 1,6 | 0,4       | 56       | 51,6       | 71         | 13,4         |
| C8  | 1,9   | 0,5 | 0,8 | 0,2       | 40       | 43,8       | 58         | 23,0         |
| C12 | 1,7   | 0,3 | 0,7 | 0,1       | 61       | 28,2       | 59         | 16,2         |
| C16 | 1,1   | 0,1 | 0,5 | 0,1       | 43       | 23,4       | 59         | 21,1         |

Id/Is - dimer intensity/monomer intensity, Int - Raman Intensity, EF - enhancement factor, St. E - standard error.

Table S3. Results for AuNPs on the surface of Si substrate

| Si  | Id/Is | StE | EF  | StE in EF | Dimers # | Int Dimers | Monomers # | Int Monomers |
|-----|-------|-----|-----|-----------|----------|------------|------------|--------------|
| C6  | 8,6   | 0,9 | 4,3 | 1,8       | 27       | 104,24     | 9          | 12,15        |
| C8  | 4,2   | 0,5 | 2,1 | 0,9       | 5        | 59,38      | 5          | 14,22        |
| C12 | 3,3   | 0,1 | 1,7 | 0,3       | 16       | 36,83      | 3          | 11,19        |
| C16 | 1,9   | 0,2 | 0,9 | 0,4       | 7        | 29,03      | 25         | 15,38        |

Id/Is - dimer intensity/monomer intensity, Int - Raman Intensity, EF - enhancement factor, St. E - standard error.

Table S4. Results for AuNPs on the surface of Ag substrate

| Ag  | Id/Is | St. E | Dimers # | Int Dimers | Monomers # | Int Monomers |
|-----|-------|-------|----------|------------|------------|--------------|
| C3  | 4,3   | 0,8   | 31       | 103,6      | 82         | 24,0         |
| C8  | 2,8   | 0,5   | 69       | 172,8      | 74         | 62,6         |
| C12 | 1,4   | 0,3   | 28       | 68,9       | 30         | 47,9         |
| C16 | 1,4   | 0,3   | 42       | 82,5       | 63         | 54,5         |

Id/Is - dimer intensity/monomer intensity, Int - Raman Intensity, EF - enhancement factor, St. E - standard error.

Table S5. Results for linear trimers on the surface of Al substrate

| Al   | It/Im | St. E | Trimers # | Int Trimers | Monomers # | Int Monomers |
|------|-------|-------|-----------|-------------|------------|--------------|
| 4,0  | 7,7   | 3,1   | 15        | 66,4        | 71         | 8,6          |
| 8,0  | 2,7   | 1,6   | 6         | 37,6        | 58         | 14,0         |
| 12,0 | 1,2   | 0,3   | 5         | 12,0        | 59         | 9,8          |
| 16,0 | 0,9   | 0,1   | 6         | 11,3        | 59         | 12,7         |

It/Is - trimer intensity/monomer intensity, Int - Raman Intensity, EF - enhancement factor, St. E - standard error. Grubbs outlier test is applied for both trimer and monomer intensities and up to 1 outlier excluded from average calculation ( e.g. in C4 monomer intensity calculation)

Table S6. Results for linear trimers on the surface of Au substrate

| Au  | It/Im | StE | Trimers # | Int Trimers | Monomers # | Int Monomers |
|-----|-------|-----|-----------|-------------|------------|--------------|
| C6  | 6,2   | 1,2 | 6         | 312,6       | 17         | 50,7         |
| C8  | 4,7   | 1,1 | 3         | 414,1       | 29         | 88,8         |
| C12 | 2,6   | 0,7 | 2         | 73,8        | 24         | 28,7         |

It/Is - trimer intensity/monomer intensity, Int - Raman Intensity, EF - enhancement factor, St. E - standard error.

Comments:

Ratio of EF<sub>d</sub>/EF<sub>m</sub> is calculated as ratio of average Raman intensity per nm<sup>2</sup> for dimers divided by average Raman intensity per nm<sup>2</sup> for singles (monomers). Raman intensity per nm<sup>2</sup> is calculated for each dimer or single AuNP using the spherical approximation. This approach is described in details about this approach can be found in publication of Sergiienko et. al. Briefly Raman Intensity of each monomer, dimer or trimer is divided by the sum of surface areas of nanoparticles in nanostructure. For instance, for a given dimer  $x$ .  $EF_{dx} = I_{dx} / (4 * \pi * R_{x1} + 4 * \pi * R_{x2})$ , where  $R_{x1}$  and  $R_{x2}$  are 1/2 of the height of each nanoparticle in a given dimer, measured by AFM. The average EF<sub>d</sub> and average EF<sub>m</sub> are calculated for each sample and their ratio is reported as EF<sub>d</sub>/EF<sub>m</sub>.

Table S7. TEM results for interparticle distance measurement in nm. MIN – minimum gap, MAX – maximum gap, STD DEV – standard deviation, RSDEV – relative standard deviation, St Error – standard error.

| №               | C4   | C6   | C8   | C12  | C16  |
|-----------------|------|------|------|------|------|
| 1               | 1,06 | 0,68 | 1,79 | 1,9  | 2,94 |
| 2               | 0,93 | 0,94 | 1,46 | 1,84 | 2,46 |
| 3               | 0,93 | 0,91 | 1,84 | 1,64 | 2,26 |
| 4               | 1,28 | 0,46 | 1,96 | 1,57 | 2,55 |
| 5               | 0,91 | 1,02 | 2,29 | 1,38 | 2,2  |
| 6               | 1,14 | 0,91 | 1,22 | 1,39 | 2,38 |
| 7               | 0,81 | 1,02 | 1,74 | 1,82 | 2,1  |
| 8               | 1,15 | 0,91 | 1,33 | 2,16 | 2,48 |
| 9               | 1,17 | 0,91 | 2,2  | 2,15 | 1,79 |
| 10              | 0,98 | 0,68 | 1,29 | 2,22 | 2,54 |
| 11              | 1,02 | 0,94 | 1,33 | 2,1  | 1,64 |
| 12              | 1,17 | 1,14 | 1,28 | 2,93 | 2,66 |
| 13              | 0,91 | 0,91 | 1,33 | 1,36 | 2,55 |
| 14              | 0,77 | 0,77 | 1,06 | 2,24 | 2,04 |
| 15              | 1,02 | 0,73 | 1,29 | 2,15 | 2,3  |
| <b>Average</b>  | 1,02 | 0,86 | 1,6  | 1,9  | 2,3  |
| <b>MIN</b>      | 0,8  | 0,5  | 1,1  | 1,4  | 1,6  |
| <b>MAX</b>      | 1,3  | 1,1  | 2,3  | 2,9  | 2,9  |
| <b>STD DEV</b>  | 0,1  | 0,2  | 0,4  | 0,4  | 0,3  |
| <b>RSDEV</b>    | 0,14 | 0,20 | 0,24 | 0,22 | 0,14 |
| <b>St Error</b> | 0,04 | 0,04 | 0,10 | 0,11 | 0,09 |

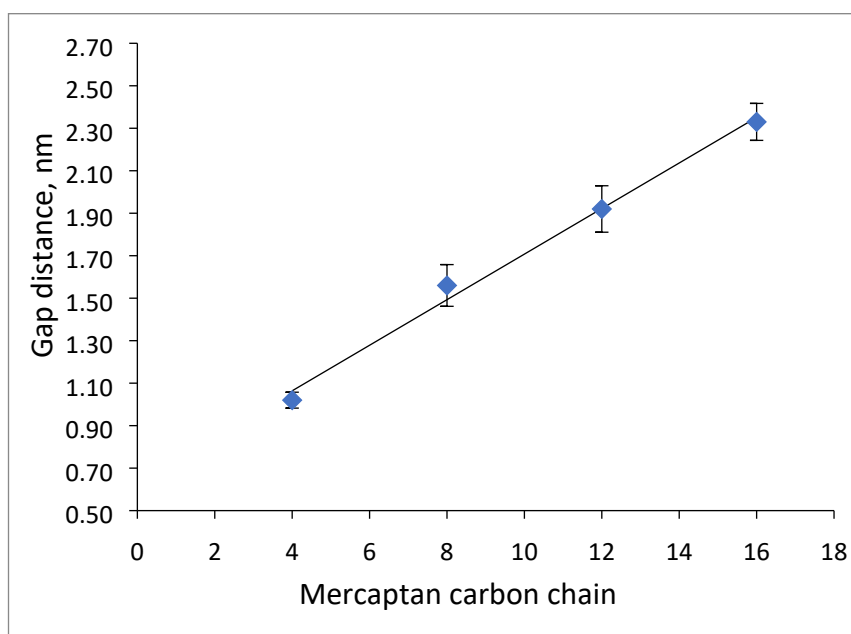

Insert Figure for Table S7. Graph of mercaptan chain length versus gap distance in nm.

Table S8. R<sup>2</sup> values and fit equations for all graphs.

| R <sup>2</sup> Table                    | R <sup>2</sup> Exponential | Equation                | R <sup>2</sup> Linear | Equation              | R <sup>2</sup> Power | Equation               |
|-----------------------------------------|----------------------------|-------------------------|-----------------------|-----------------------|----------------------|------------------------|
| Au film Int                             | 0,951                      | $y = 23,478e^{-1,111x}$ | 0,943                 | $y = -4,794x + 12,44$ | 0,914                | $y = 7,561x^{-1,589}$  |
| Au film EF                              | 0,937                      | $y = 9,368e^{-1,041x}$  | 0,912                 | $y = -1,984x + 5,263$ | 0,897                | $y = 3,237x^{-1,487}$  |
| Al film Int (2 pt)                      | 0,958                      | $y = 9,087e^{-0,906x}$  | 0,896                 | $y = -2,009x + 5,578$ | 0,969                | $y = 3,905x^{-1,43}$   |
| Al film EF (2 pt)                       | 0,955                      | $y = 3,214e^{-0,78x}$   | 0,892                 | $y = -0,755x + 2,207$ | 0,981                | $y = 1,560x^{-1,241}$  |
| Si wafer Int                            | 0,989                      | $y = 10,284e^{-1,003x}$ | 0,961                 | $y = -2,272x + 6,031$ | 0,958                | $y = 3,659x^{-1,426}$  |
| Si wafer EF                             | 0,990                      | $y = 20,498e^{-1,001x}$ | 0,961                 | $y = -4,54x + 12,055$ | 0,960                | $y = 7,313x^{-1,424}$  |
| Ag film                                 | 0,924                      | $y = 5,592e^{-0,096x}$  | 0,928                 | $y = -0,239x + 4,799$ | 0,923                | $y = 4,243x^{-1,386}$  |
| Al film Trimer                          | 0,951                      | $y = 13,358e^{-0,182x}$ | 0,806                 | $y = -0,546x + 8,580$ | 0,996                | $y = 70,515x^{-1,595}$ |
| Au film Trimer                          | 1,000                      | $y = 14,915e^{-0,146x}$ | 0,991                 | $y = -0,589x + 9,568$ | 0,988                | $y = 62,685x^{-1,276}$ |
| Average All R <sup>2</sup>              | 0,963                      |                         | 0,921                 |                       | 0,954                |                        |
| Average R <sup>2</sup> for dimer ratios | 0,960                      |                         | 0,927                 |                       | 0,944                |                        |

Int – intensity, EF – enhancement factor Maximum intensity in one point is taken for calculation of average intensities, unless specified otherwise (for 2 rows of data on Al film, sum intensity of 2 max intensity points is taken for calculation of average, where single point average have very high error bars)

Table S9 Enhancement Factor Calculation of dimers (dim) and monomers (mon) for all samples on 4 substrates

| Substrate | Chain | I dim  | I mon | EF dim   | EF mon   | Id / I m | EFd/EFm |
|-----------|-------|--------|-------|----------|----------|----------|---------|
| Au/gold   | C6    | 456.8  | 50.7  | 4.32E+06 | 9.59E+05 | 9.01     | 4.51    |
|           | C4    | 415.1  | 61.2  | 3.93E+06 | 1.16E+06 | 6.78     | 3.39    |
|           | C8    | 476.1  | 88.8  | 4.51E+06 | 1.68E+06 | 5.36     | 2.68    |
|           | C12   | 70.1   | 28.7  | 6.64E+05 | 5.43E+05 | 2.44     | 1.22    |
|           | C16   | 53.5   | 30.3  | 5.06E+05 | 5.74E+05 | 1.76     | 0.88    |
| Al        | Chain | I dim  | I mon | EF dim   | EF mon   | Id / I m | EFd/EFm |
|           | C4    | 60.9   | 9.2   | 5.76E+05 | 1.74E+05 | 6.62     | 3.31    |
|           | C8    | 39.51  | 14.02 | 3.74E+05 | 2.65E+05 | 2.82     | 1.41    |
|           | C12   | 22.47  | 9.78  | 2.13E+05 | 1.85E+05 | 2.30     | 1.15    |
|           | C16   | 13.73  | 13.14 | 1.30E+05 | 2.49E+05 | 1.04     | 0.52    |
| Ag film   | Chain | I dim  | I mon | EF dim   | EF mon   | Id / I m | EFd/EFm |
|           | C3    | 103.6  | 24.00 | 9.80E+05 | 4.54E+05 | 4.32     | 2.16    |
|           | C8    | 172.80 | 62.60 | 1.64E+06 | 1.18E+06 | 2.76     | 1.38    |
|           | C12   | 68.90  | 47.90 | 6.52E+05 | 9.07E+05 | 1.44     | 0.72    |
|           | C16   | 82.50  | 54.50 | 7.81E+05 | 1.03E+06 | 1.51     | 0.76    |
| Si wafer  | Chain | I dim  | I mon | EF dim   | EF mon   | Id / I m | EFd/EFm |
|           | C6    | 104.24 | 12.15 | 9.87E+05 | 2.30E+05 | 8.58     | 4.29    |
|           | C8    | 59.38  | 14.22 | 5.62E+05 | 2.69E+05 | 4.18     | 2.09    |
|           | C12   | 36.83  | 11.19 | 3.49E+05 | 2.12E+05 | 3.29     | 1.65    |
|           | C16   | 29.03  | 15.38 | 2.75E+05 | 2.91E+05 | 1.89     | 0.94    |

The following data were used to calculate EFs each NP is assumed to be sphere 100 nm diameter

|                    |          |                   |
|--------------------|----------|-------------------|
| MOTP molar mass    | 140.2    | g/mole            |
| MOTP surface CS    | 0.2      | nm <sup>2</sup>   |
| MOTP density       | 1.152    | g/cm <sup>3</sup> |
| laser focal volume | 24.98    | μm <sup>3</sup>   |
| I raman            | 41.56    | a. u              |
| N sers             | 157080   | molecules/NP      |
| N raman            | 1.24E+11 | molecules         |
| S Area sphere      | 31416    | nm <sup>2</sup>   |

Average I<sub>SERS</sub> is taken from the table for each sample I dim or I mon monomer or dimer

$$N_{Raman} = \left( \frac{MOTP\ density * N_{av}}{MOTP\ molar\ mass} \right) * \left( \frac{Laser\ focal\ volume\ \mu m^3}{\frac{10^{12} \mu m^3}{cm^3}} \right)$$

EFd = (Idim/Nsers)/(Iraman/Nraman) = ((456.8/(2\*157080))/(41.56/1.24x 10<sup>11</sup>)) = 4.32 x 10<sup>6</sup>. (example of calculation for C6 dimer on gold film)

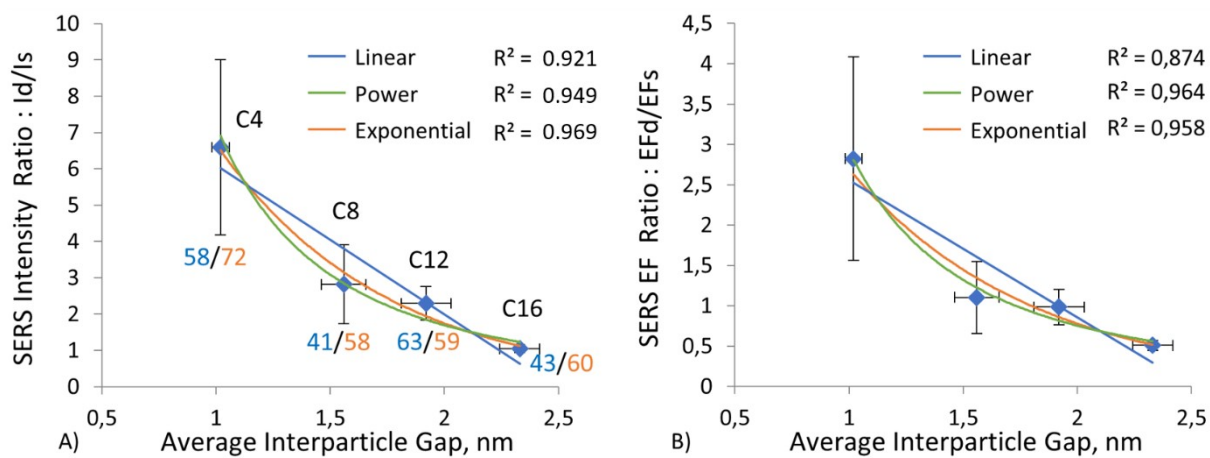

Figure S1 Ratio Id/Is and EFd/EFs (where I d and I s are intensities of dimers and singles/monomers, EFd and EFs average enhancement factors of dimers and singles respectively) for samples on Al film. The Maximum intensity in a single point is taken as SERS intensity in the same way as intensity or EF graphs on Figures 4,6,7,8 of the paper

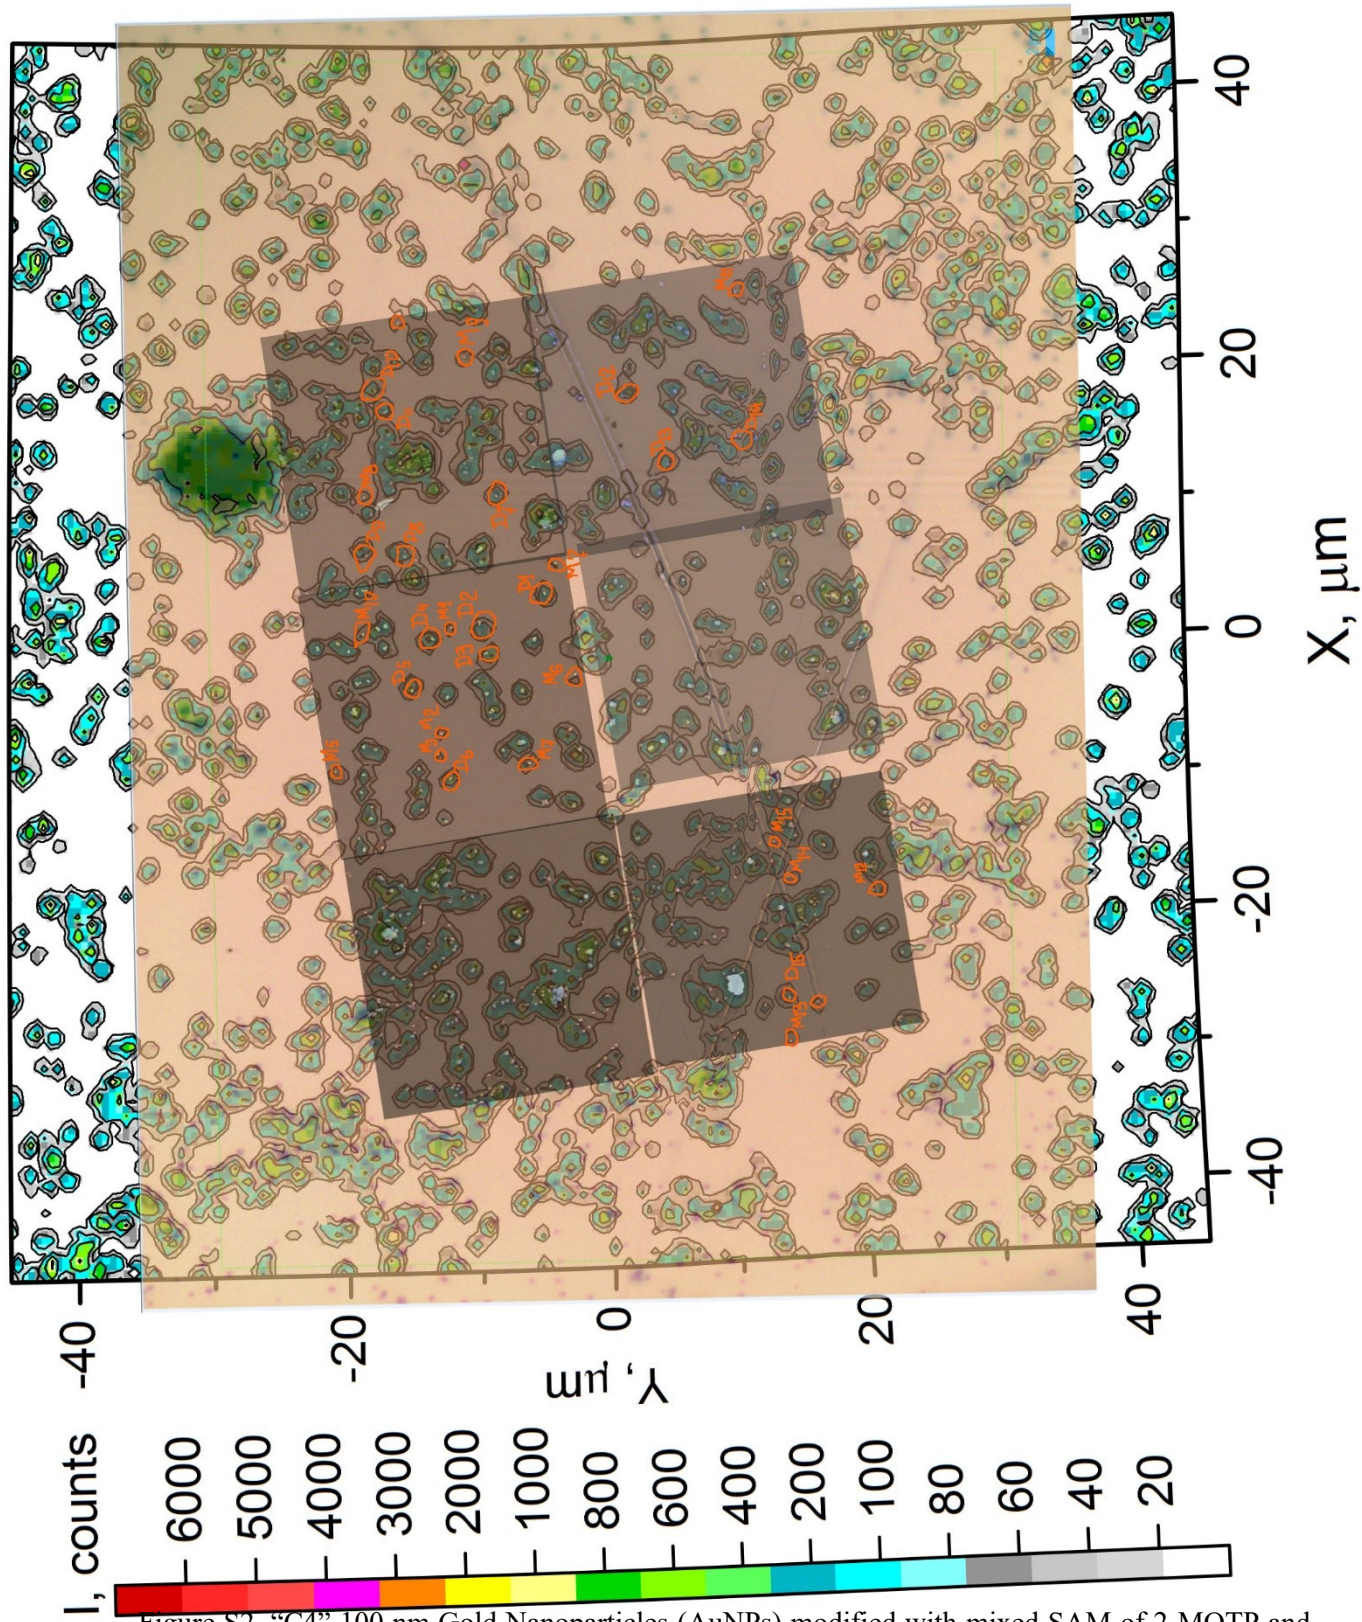





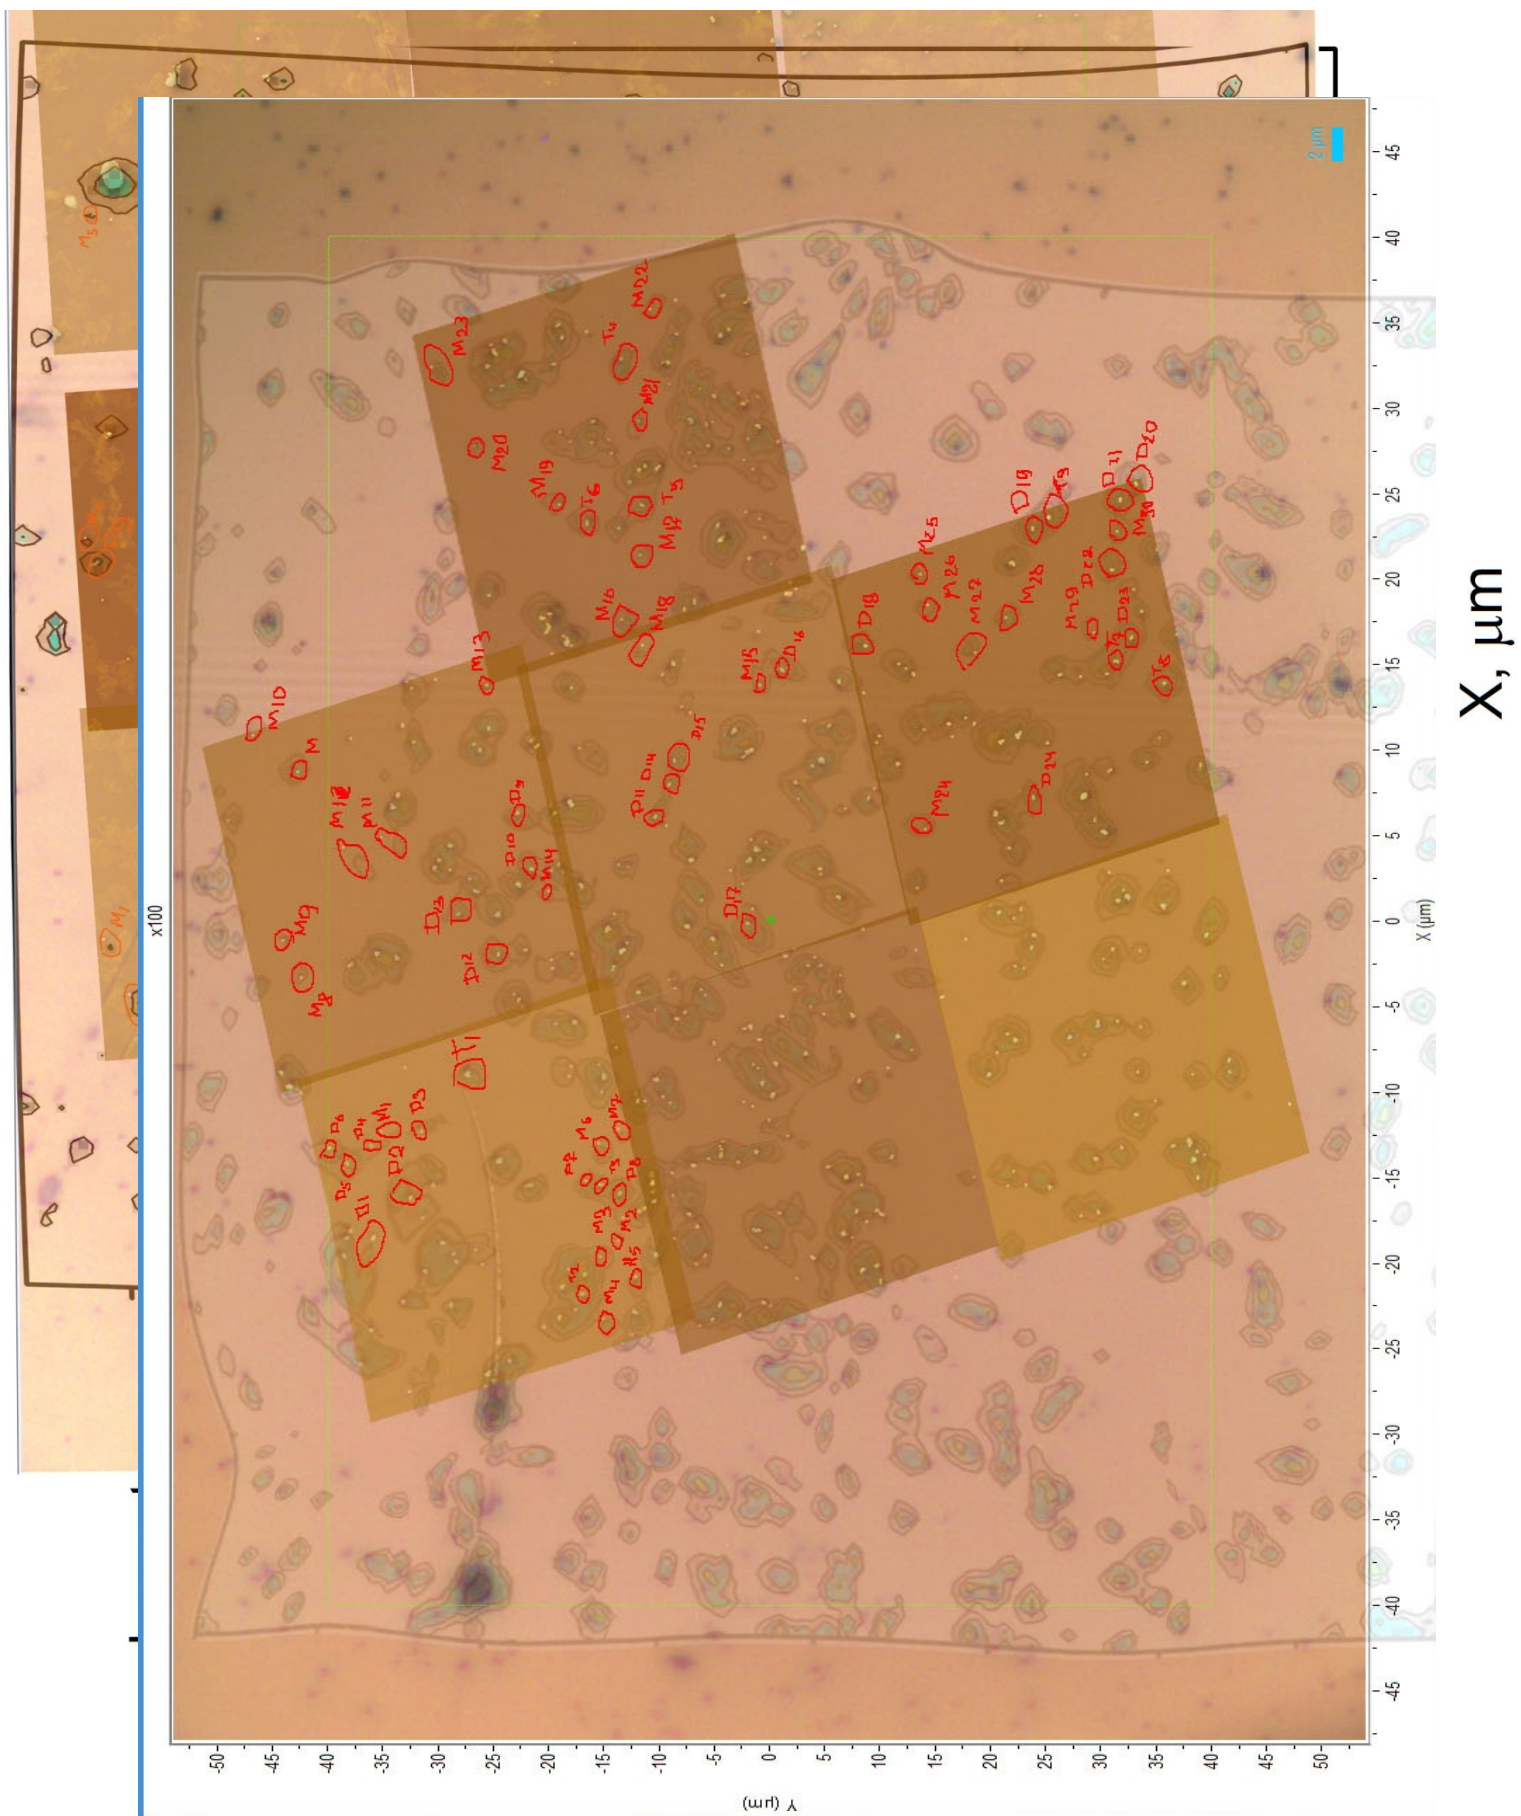

Figure S5. “C12” 100 nm AuNPs modified with mixed SAM of 2-MOTP and 12-Mercaptododecanoic acid - (hereafter called just C12 samples) on Gold film

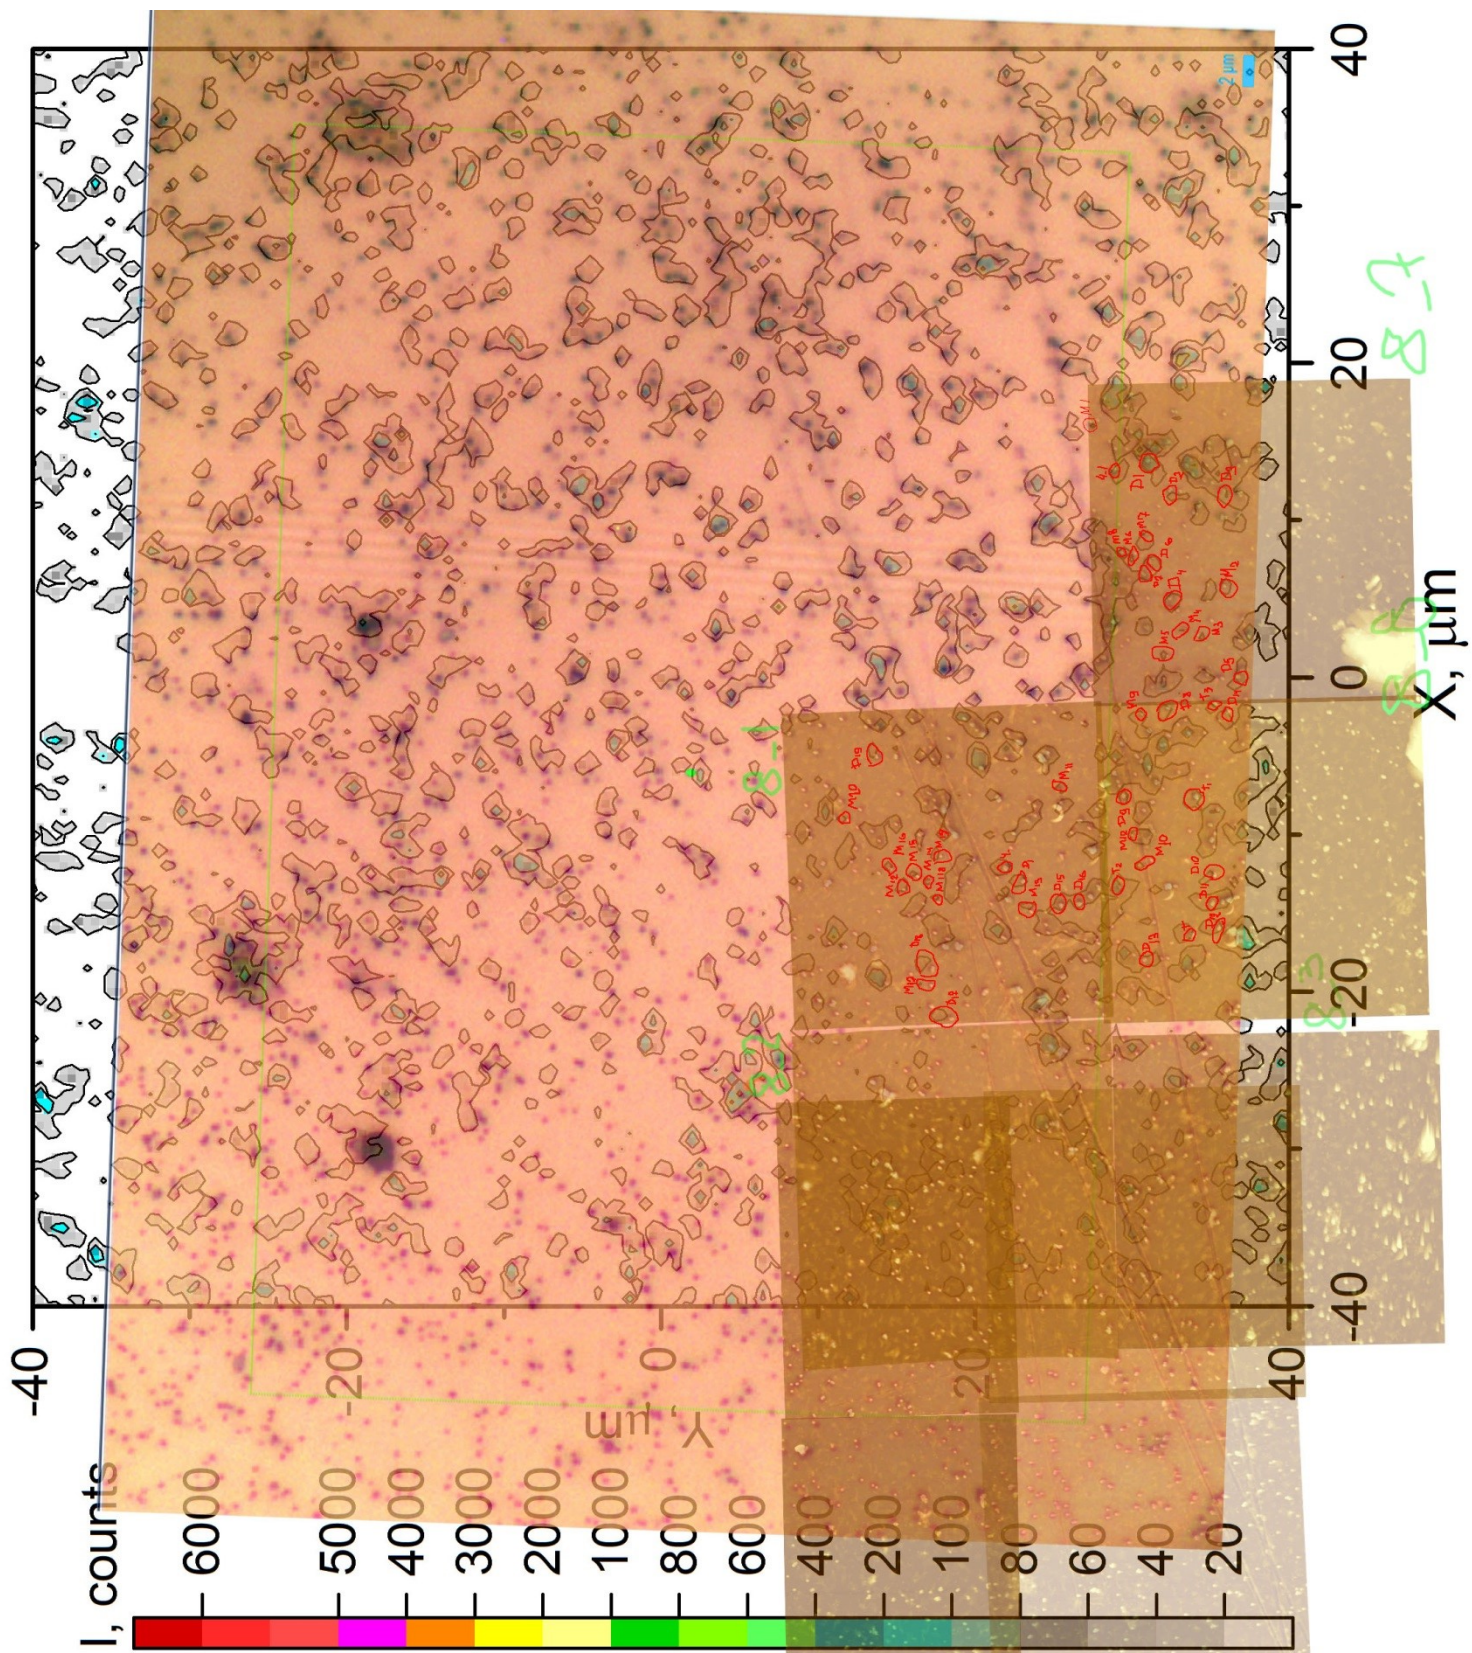

Figure S6. “C16” 100 nm AuNPs modified with mixed SAM of 2-MOTP and 16-Mercaptohexadecanoic acid - (hereafter called C16) on Gold film

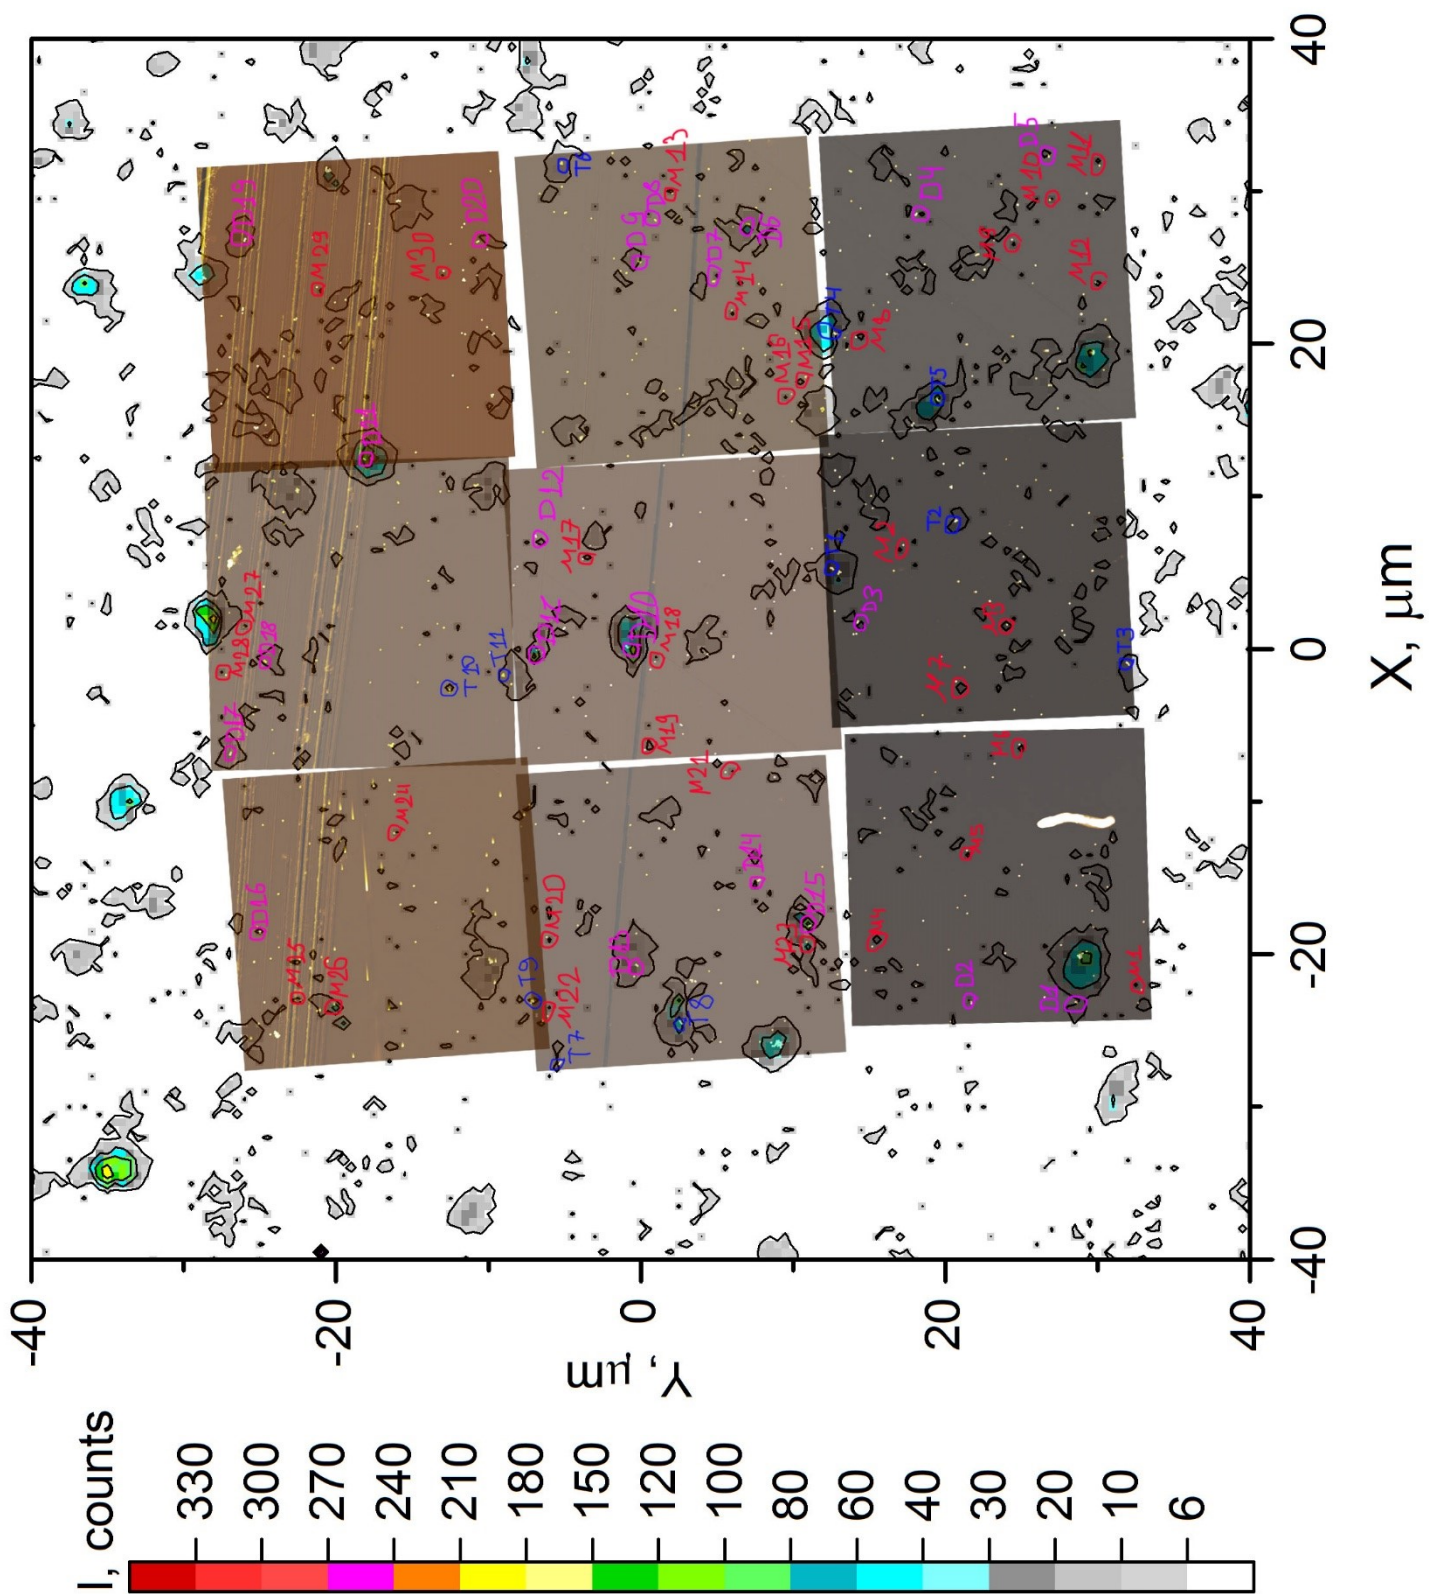

Figure S7. “C4” 100 nm Gold Nanoparticles (AuNPs) modified with mixed SAM of 2-MOTP and 4-mercaptopbenzoic acid (hereafter called just C4 samples) on Al film

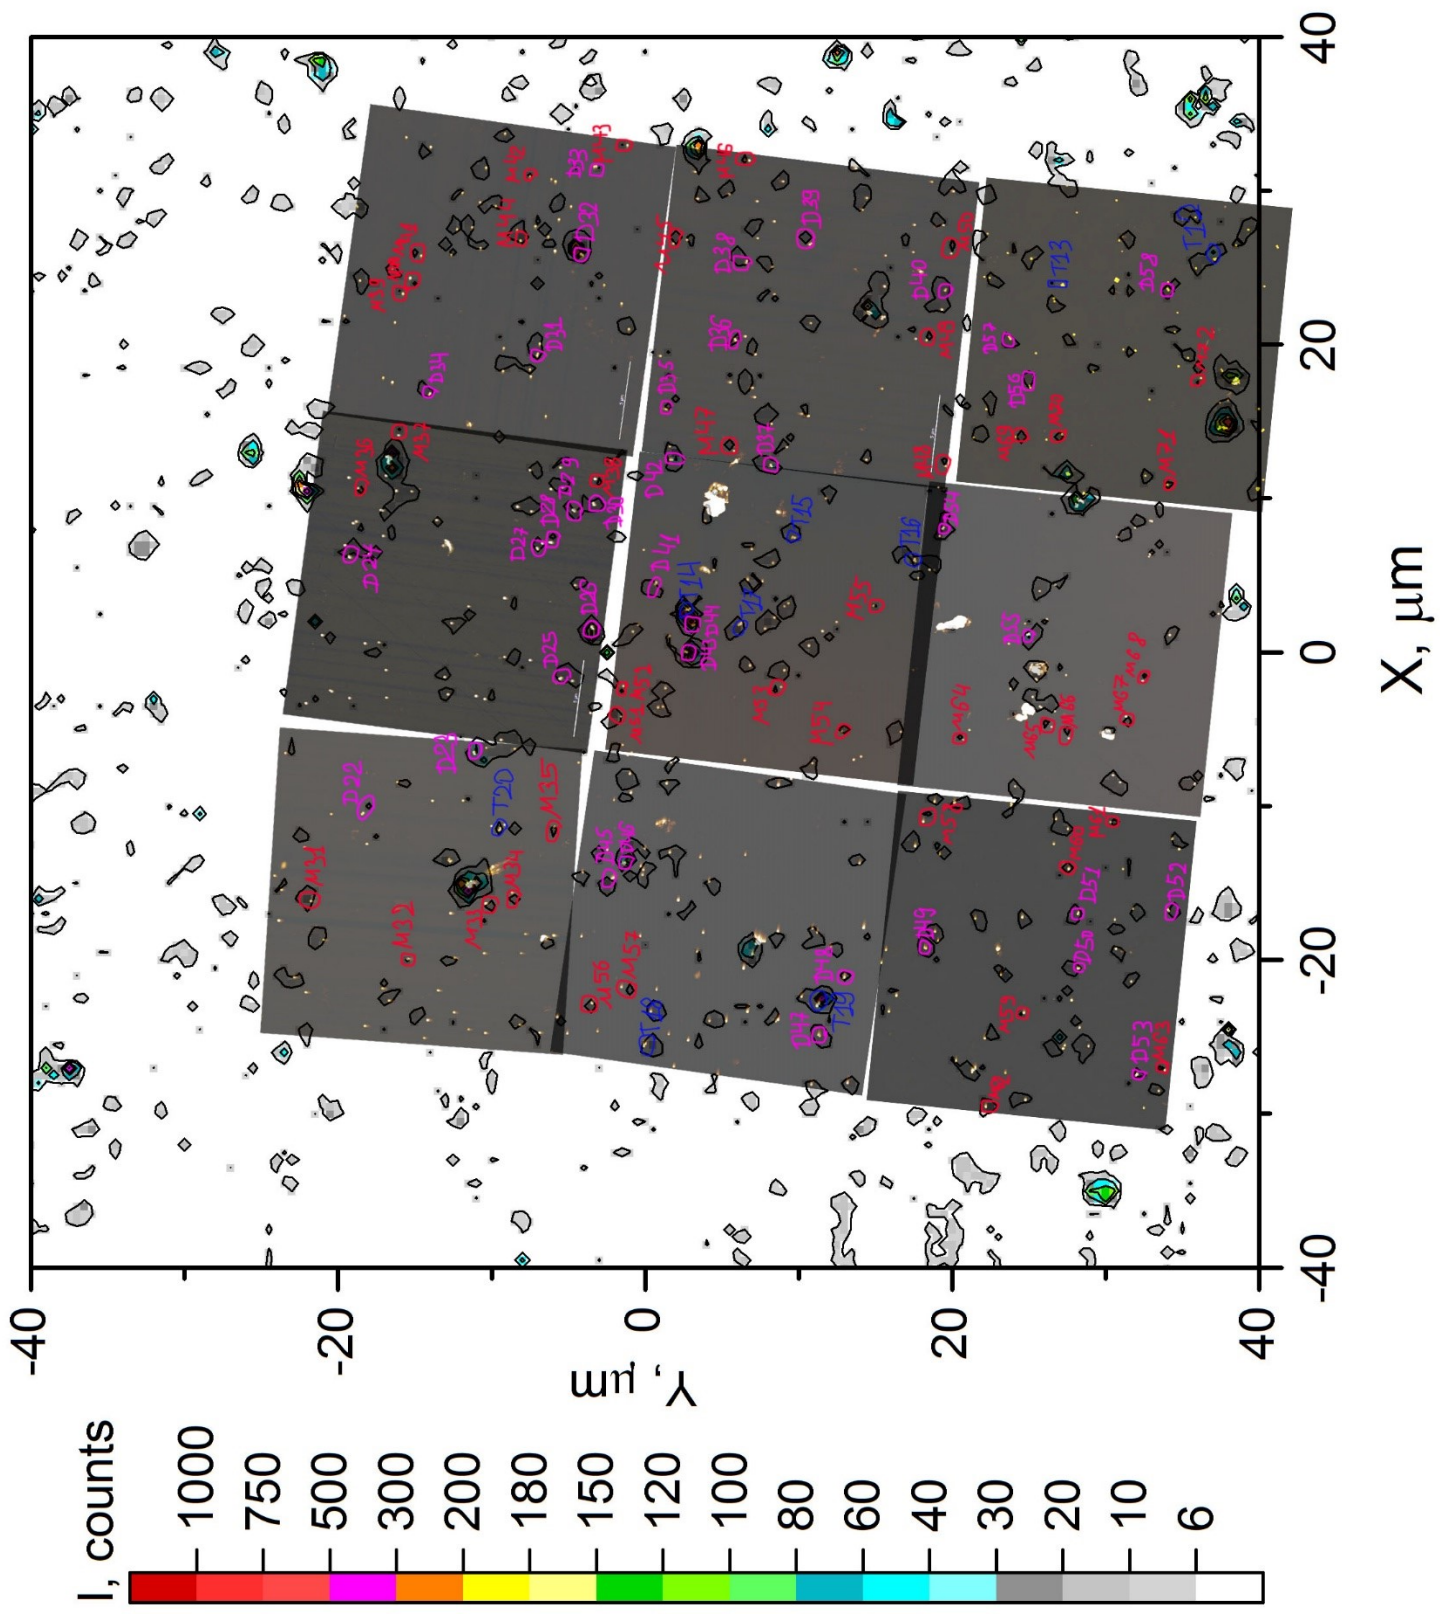

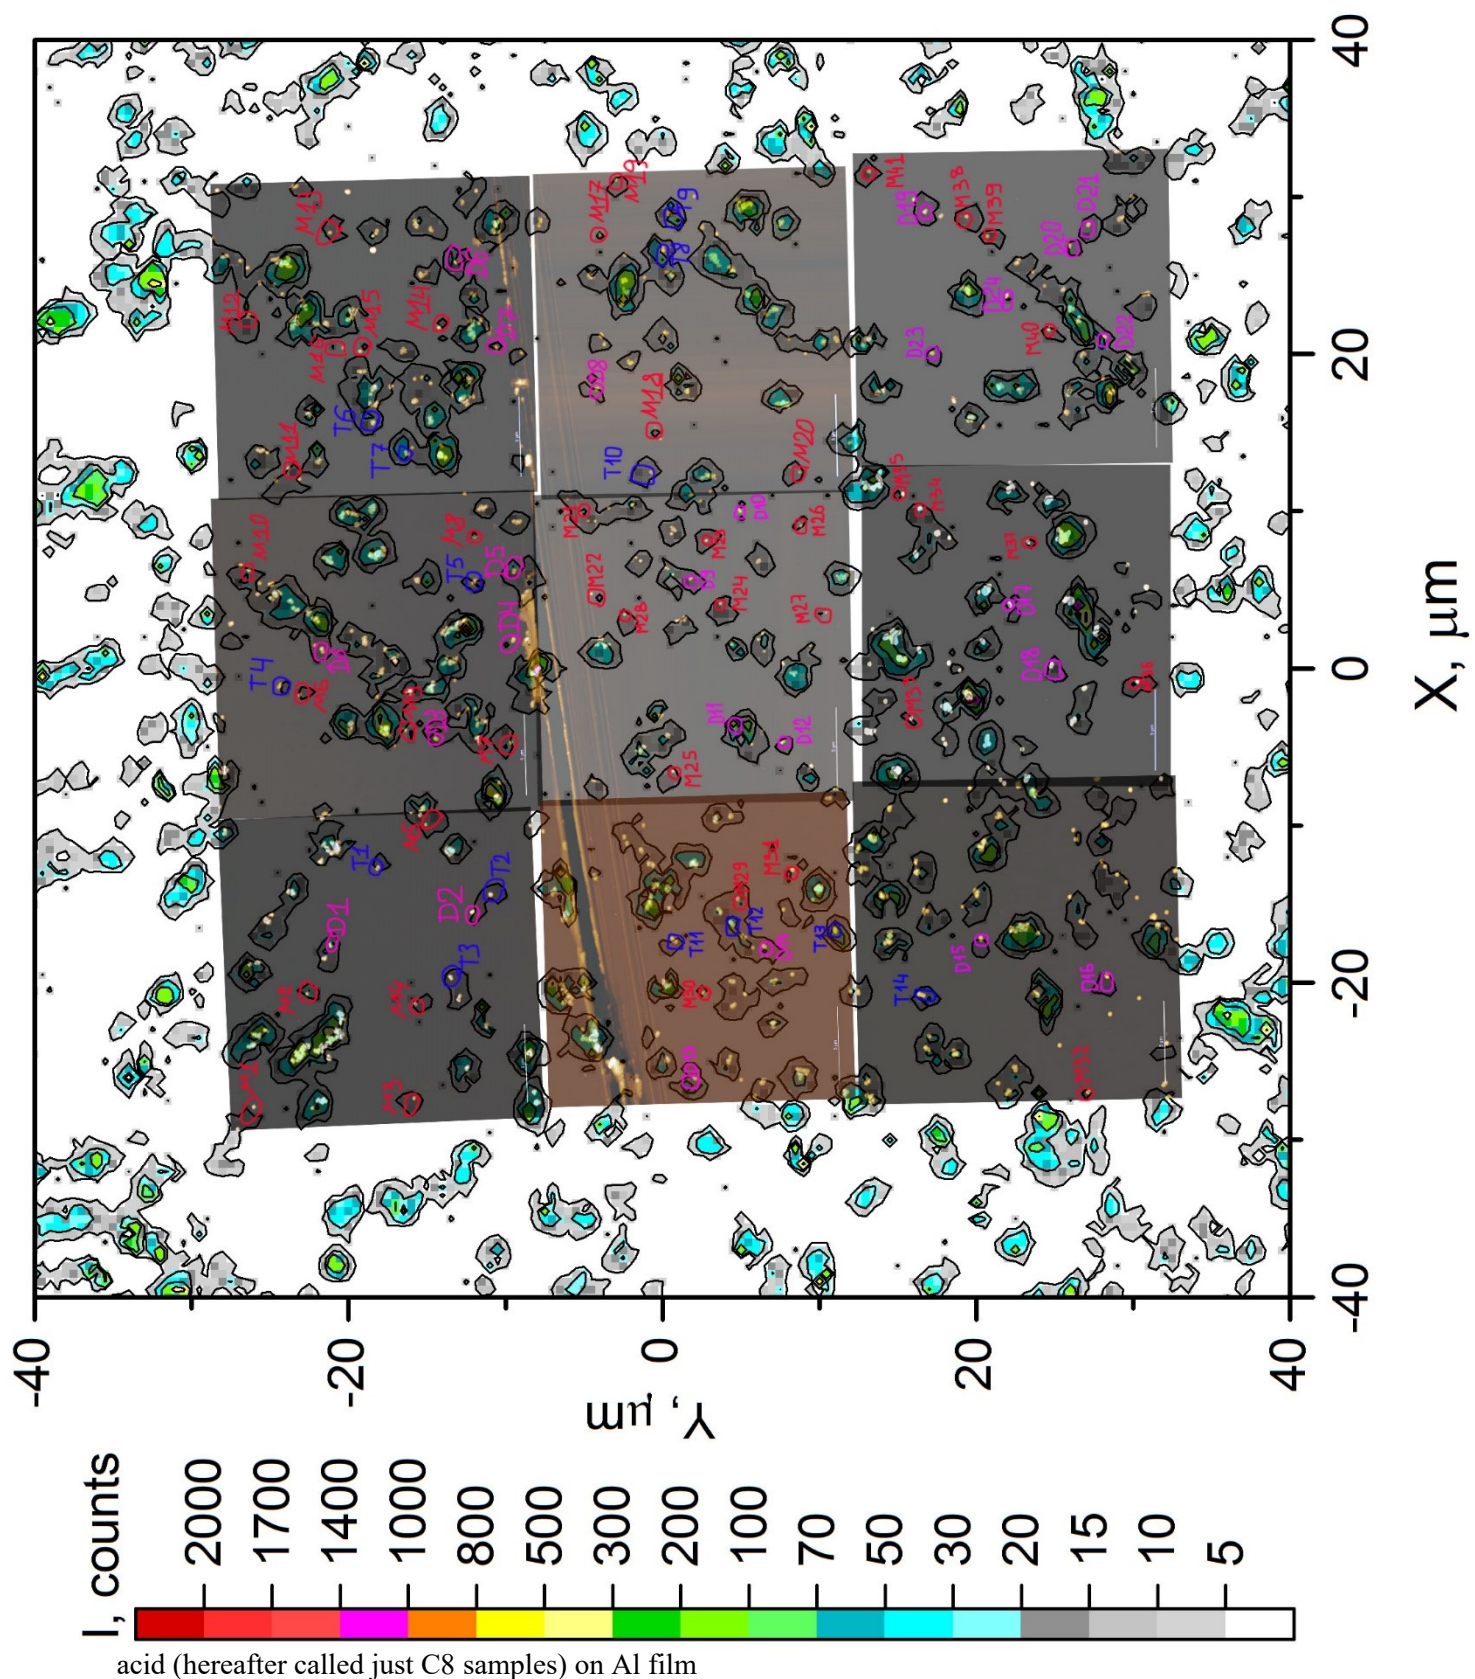

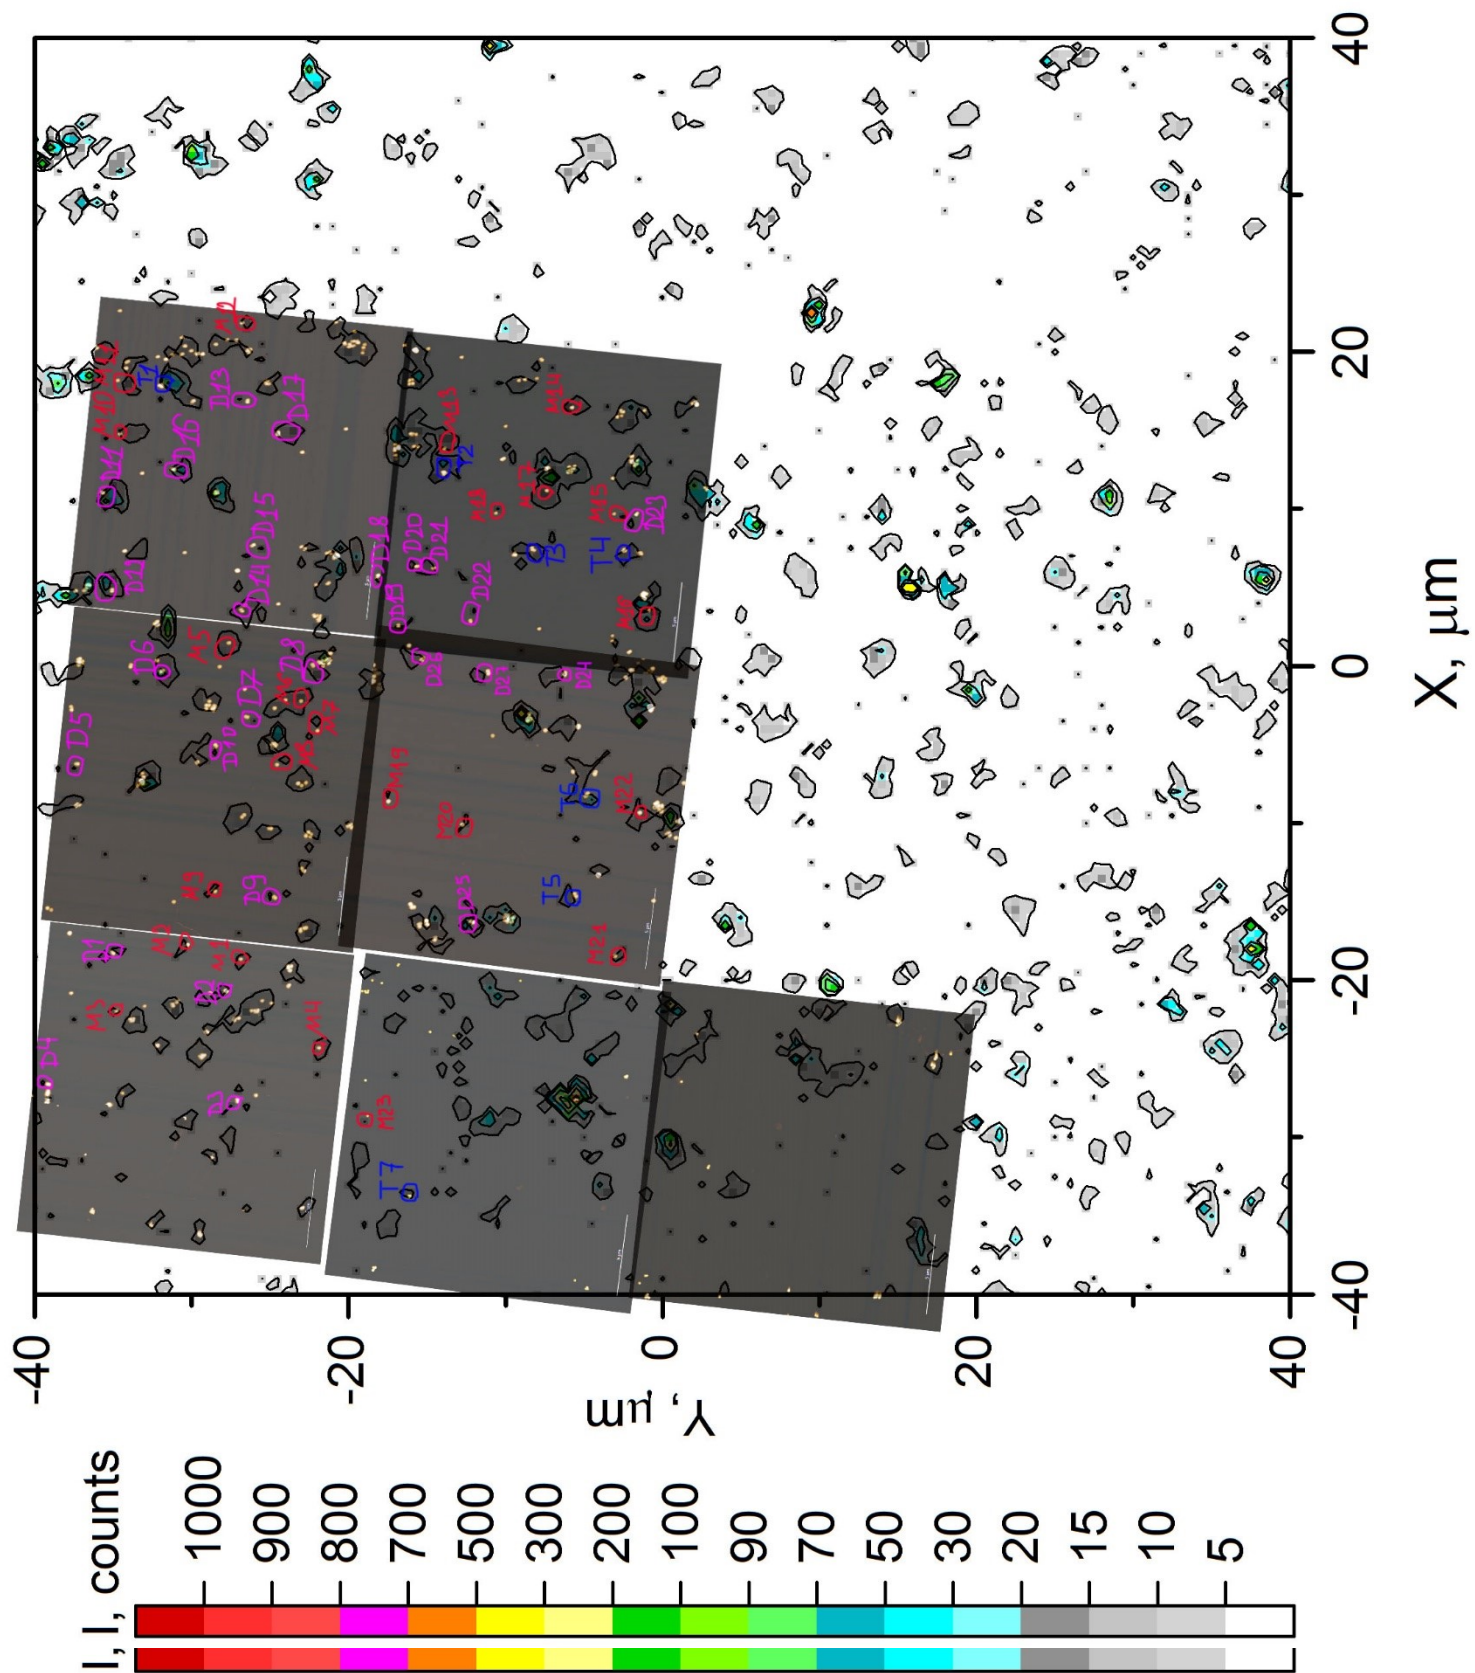

Figure S11. "C12" 100 nm AuNPs modified with mixed SAM of 2-MOTP and 12-Mercaptododecanoic acid - (hereafter called just C12 samples) on Al film

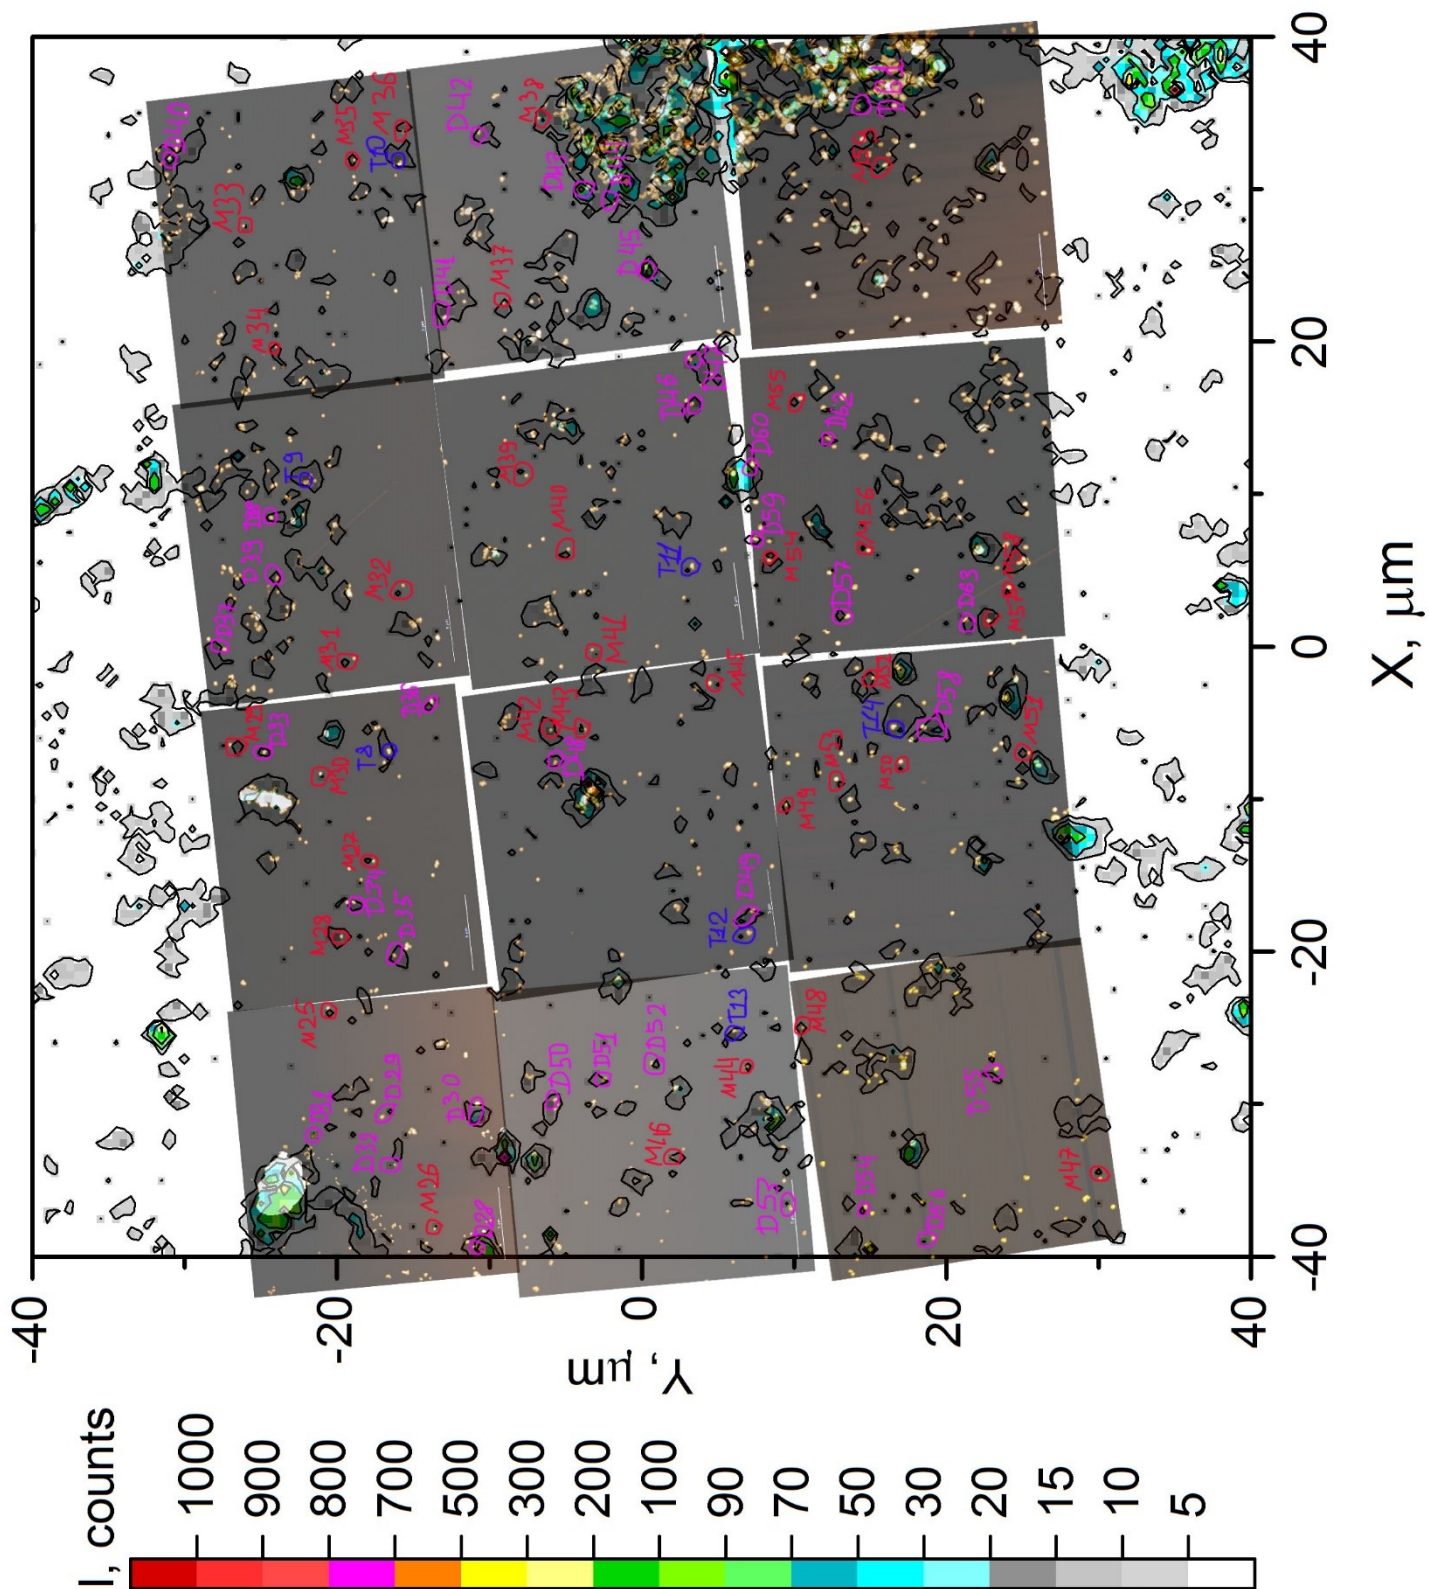

Figure S12. “C12” 100 nm AuNPs modified with mixed SAM of 2-MOTP and 12-Mercaptododecanoic acid - (hereafter called just C12 samples) on Al film

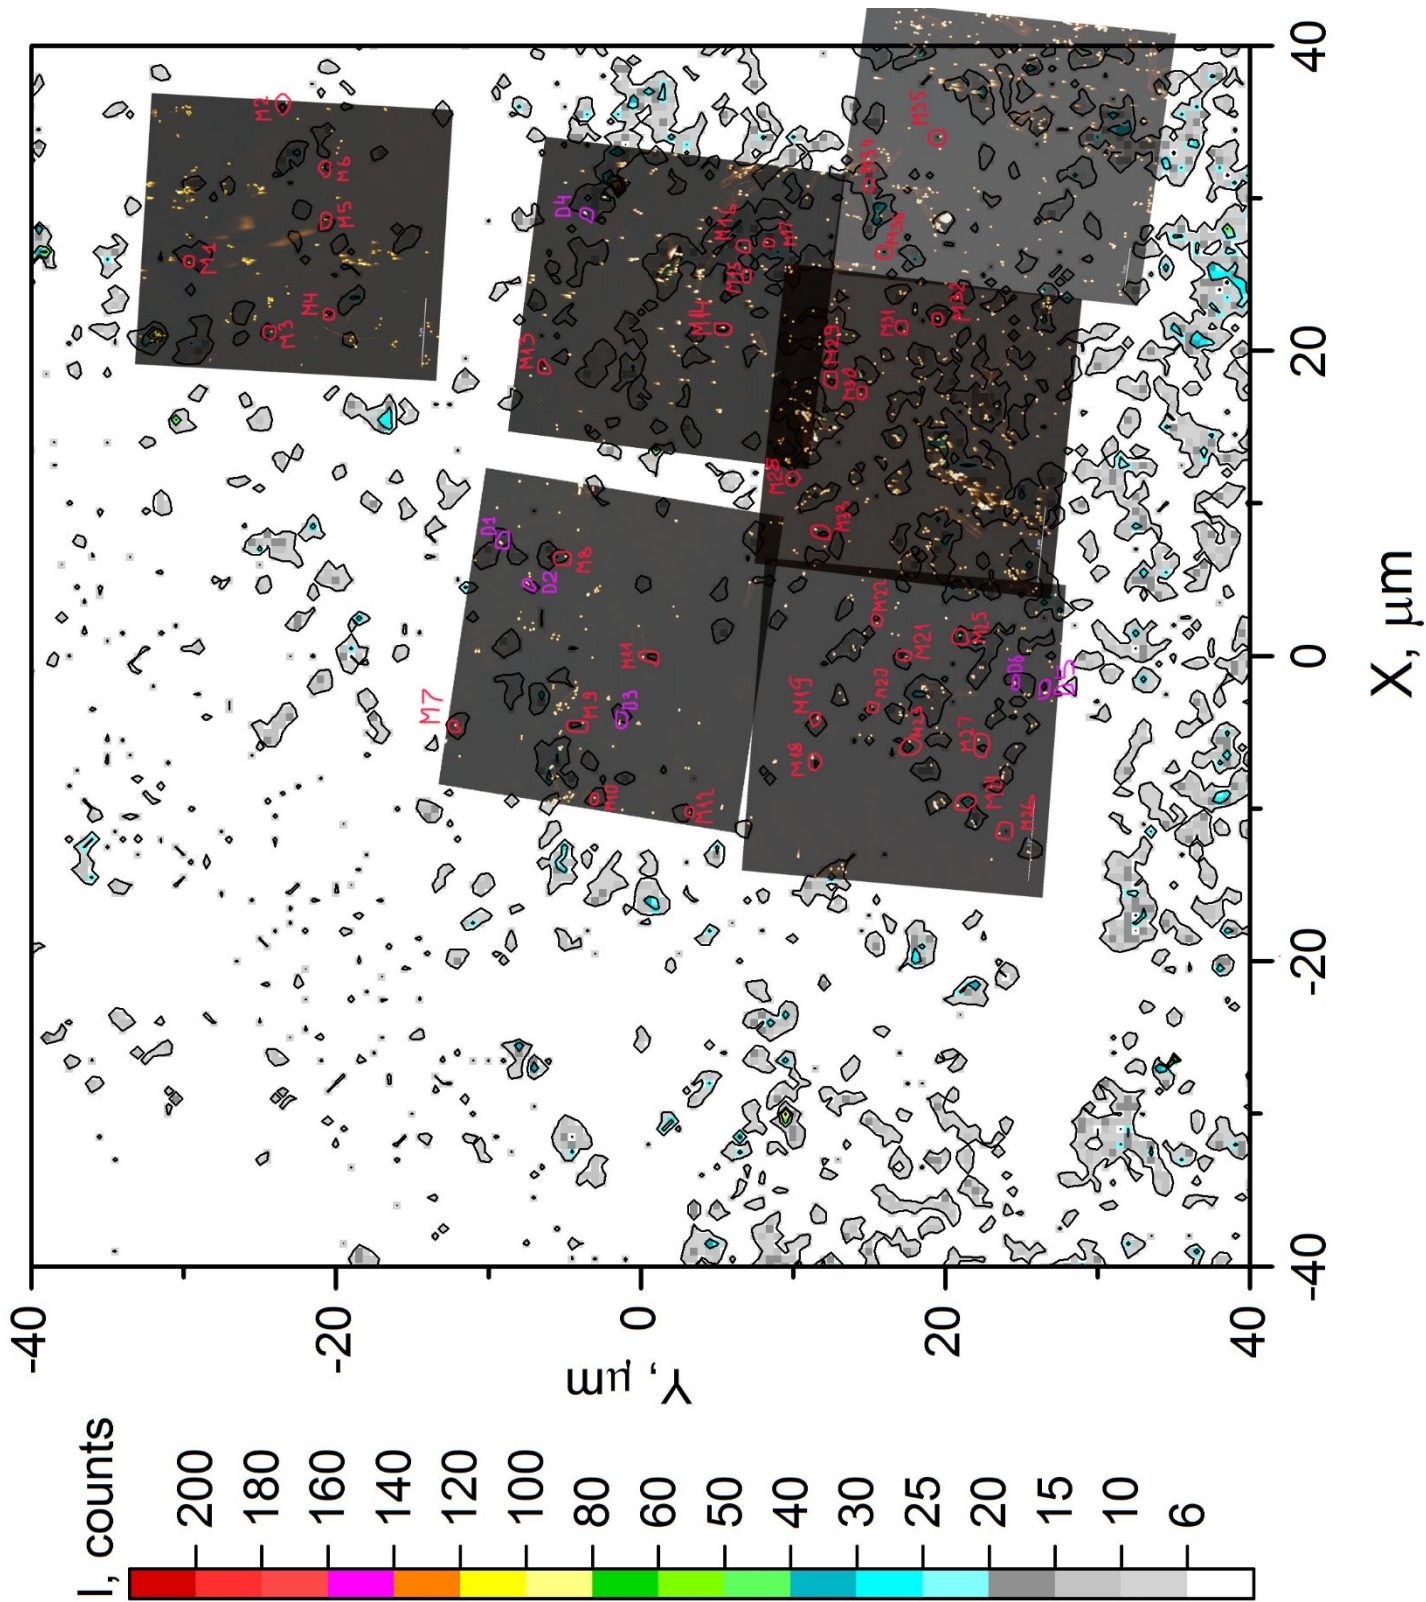

Figure S13. “C16” 100 nm AuNPs modified with mixed SAM of 2-MOTP and 16-Mercaptohexadecanoic acid - (hereafter called C16) on Al film



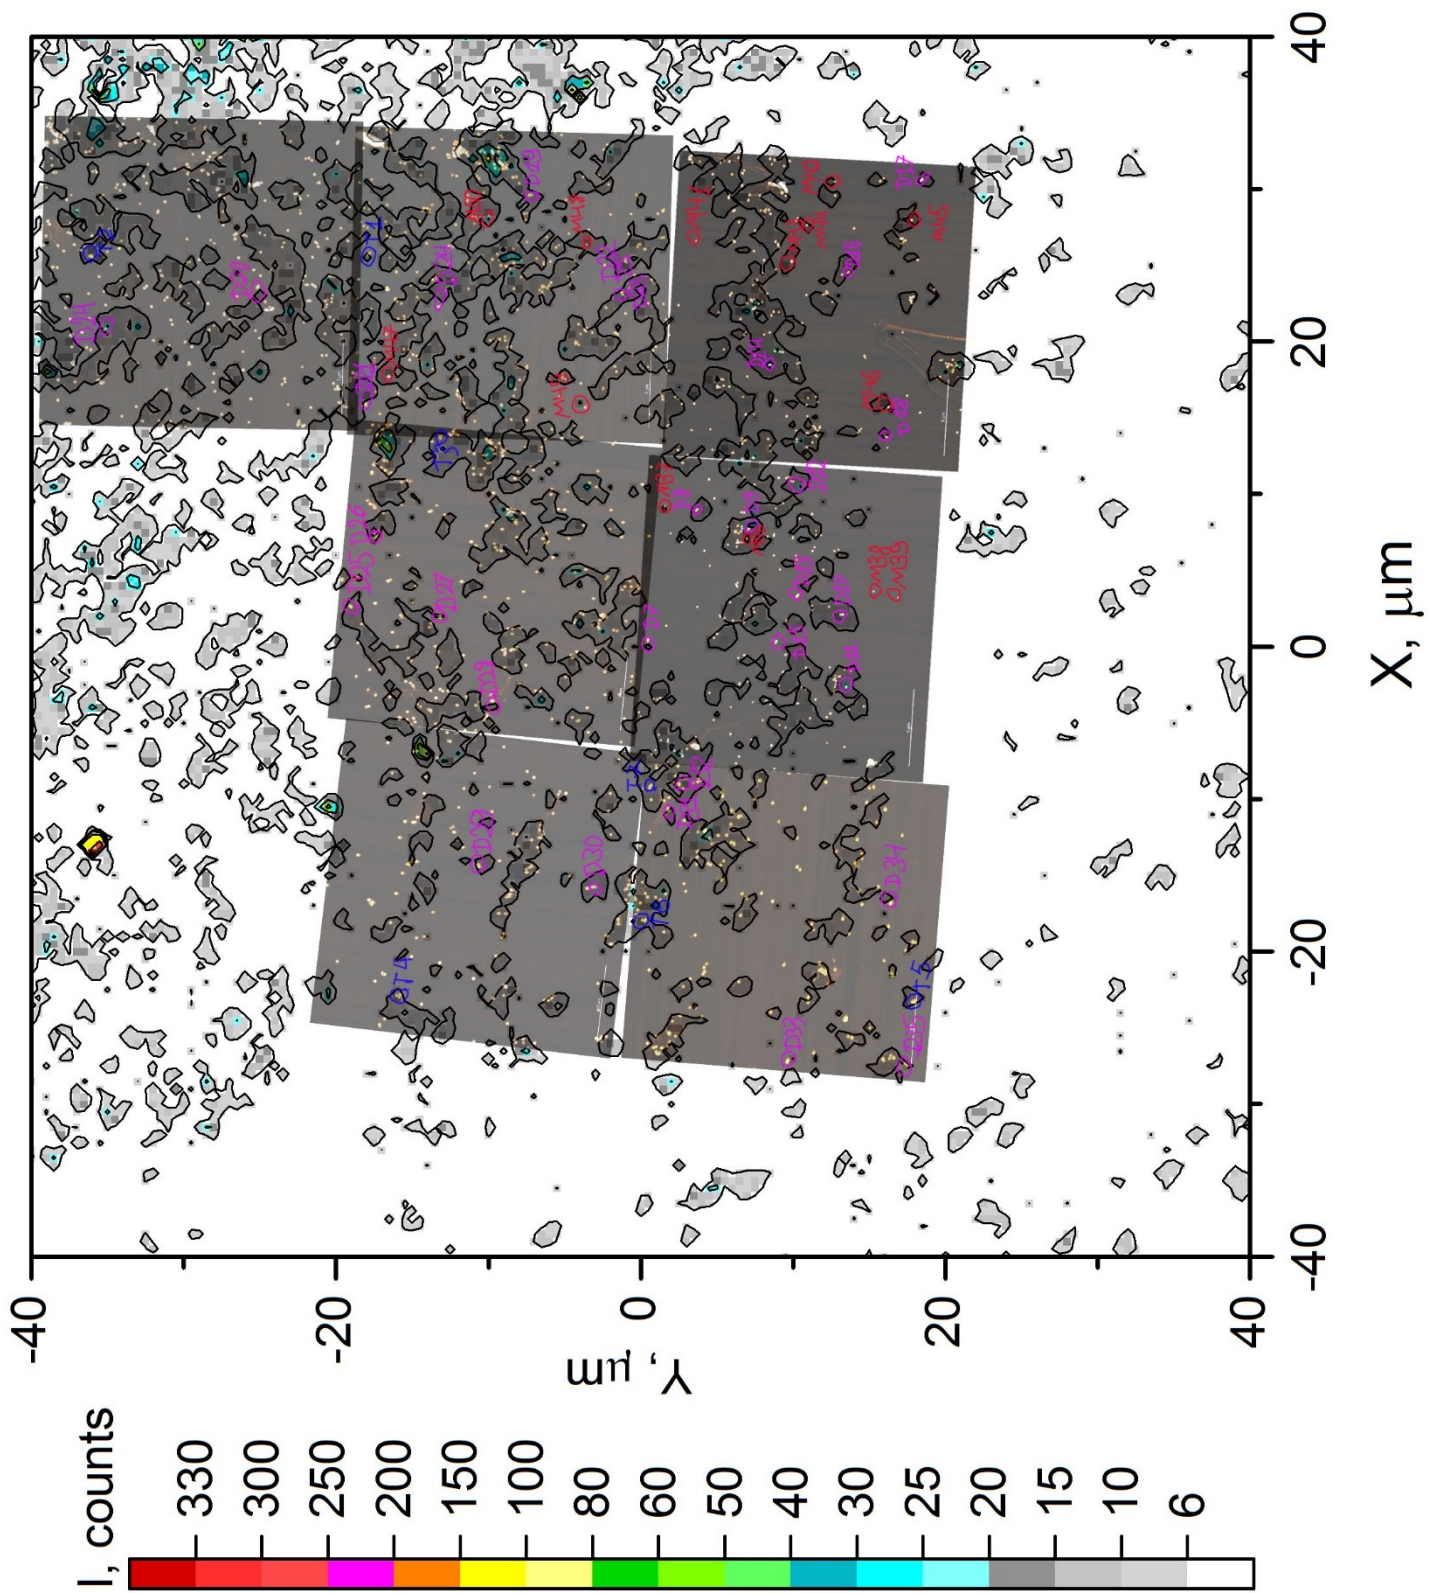

Figure S14. “C16” 100 nm AuNPs modified with mixed SAM of 2-MOTP and 16-Mercaptohexadecanoic acid - (hereafter called C16) on Al film

Figure S15 “C3” 100 nm Gold Nanoparticles (AuNPs) modified with mixed SAM of 2-MOTP and

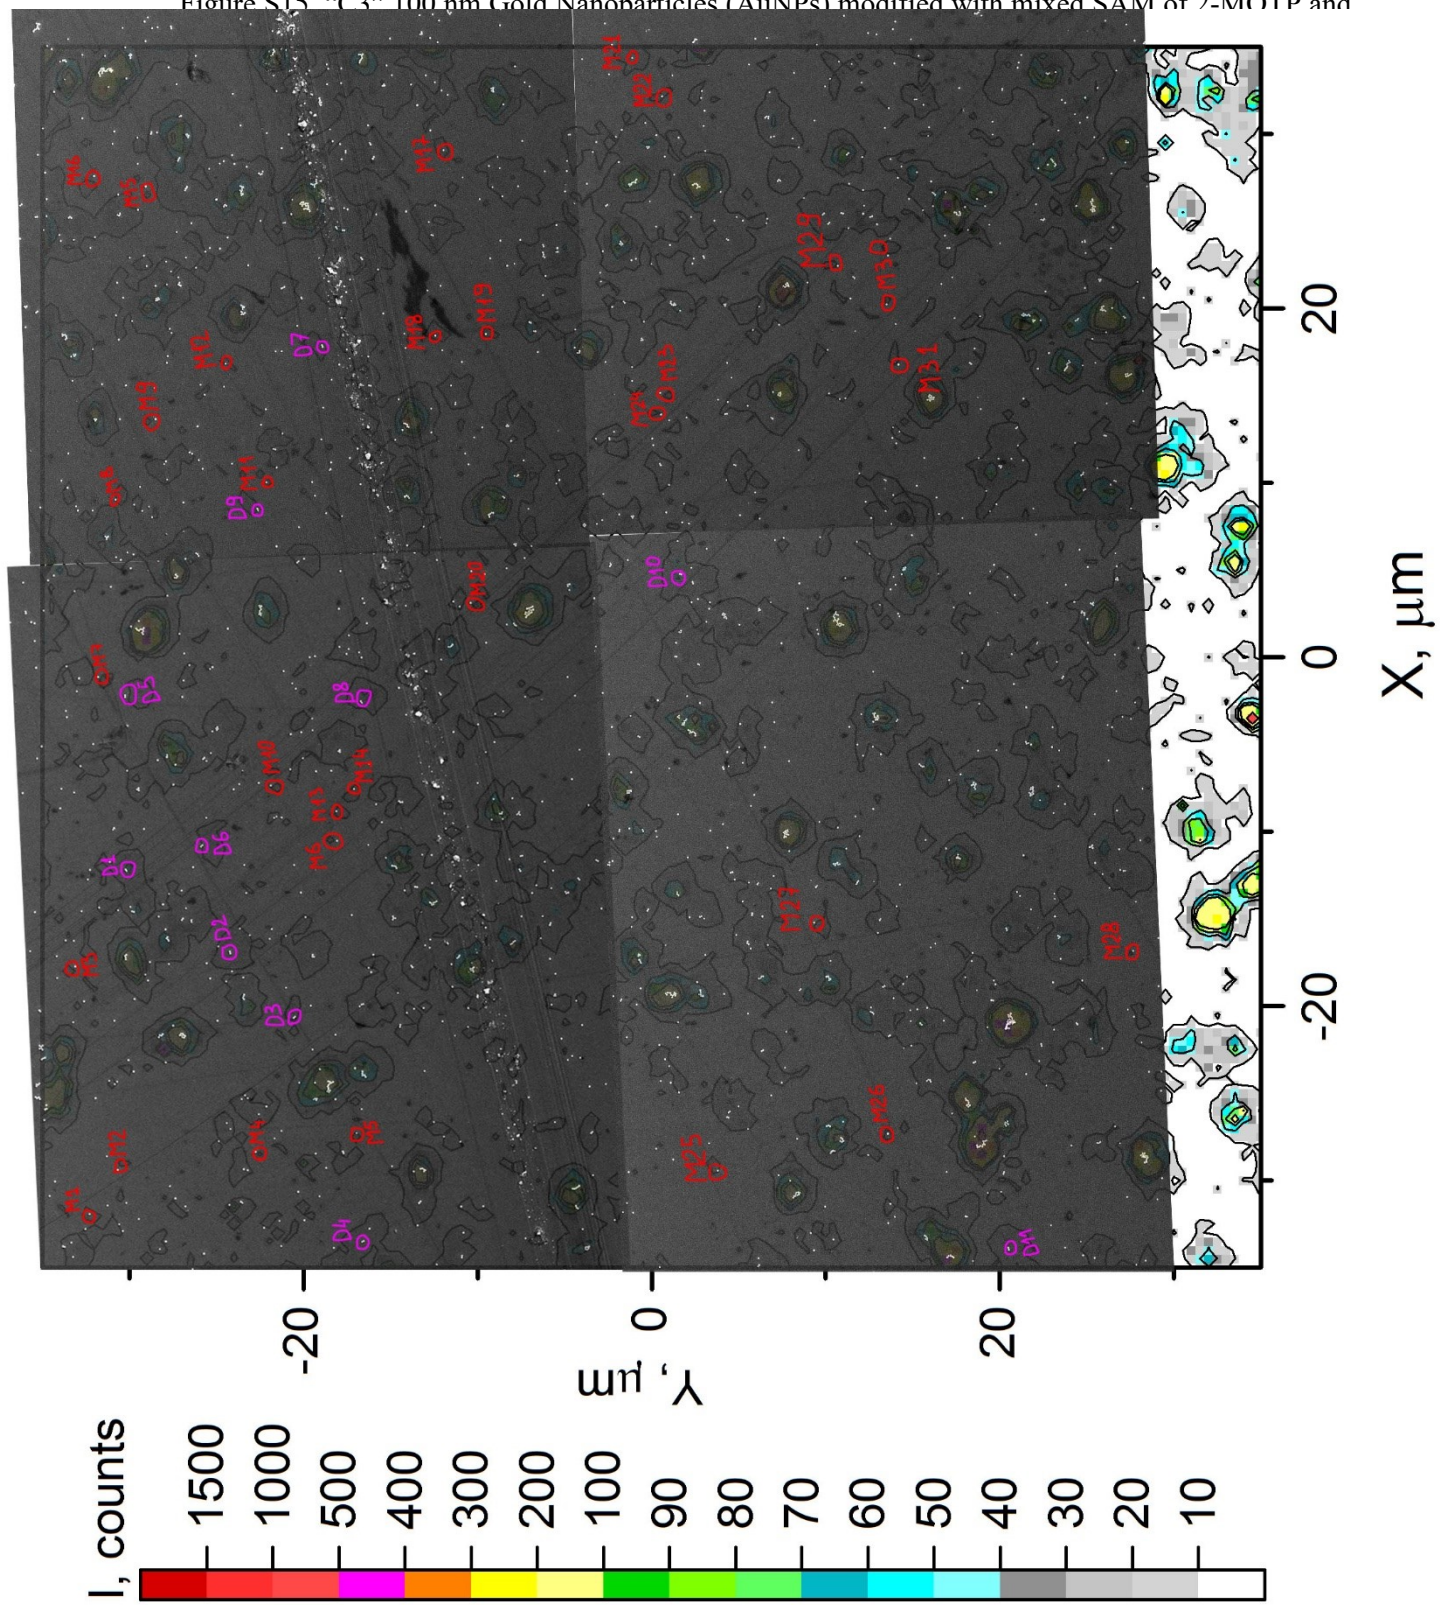

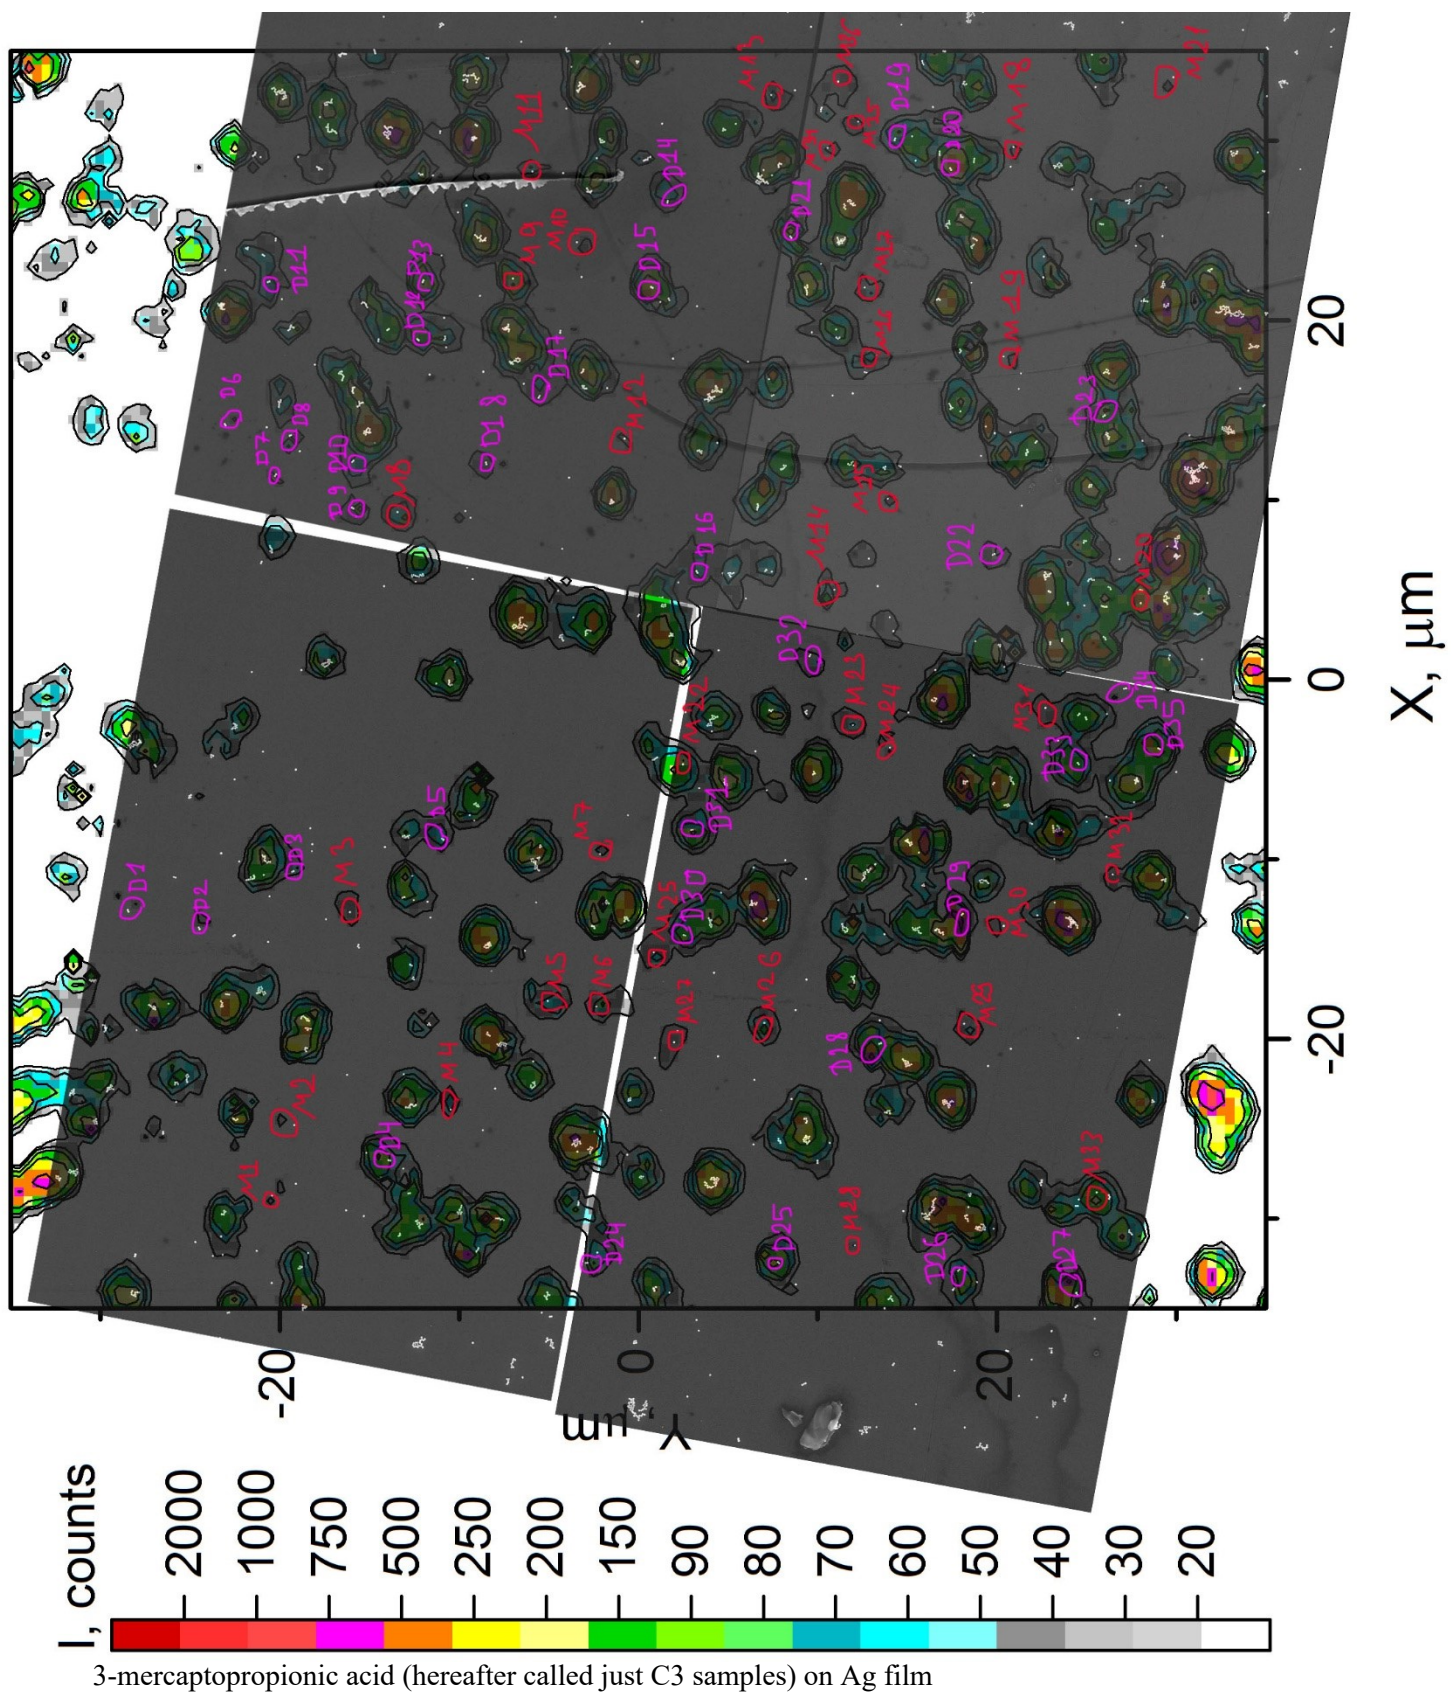

Figure S17. “C8” 100 nm AuNPs modified with mixed SAM of 2-MOTP and 8-Mercaptooctanoic acid (hereafter called just C8 samples) on Ag film

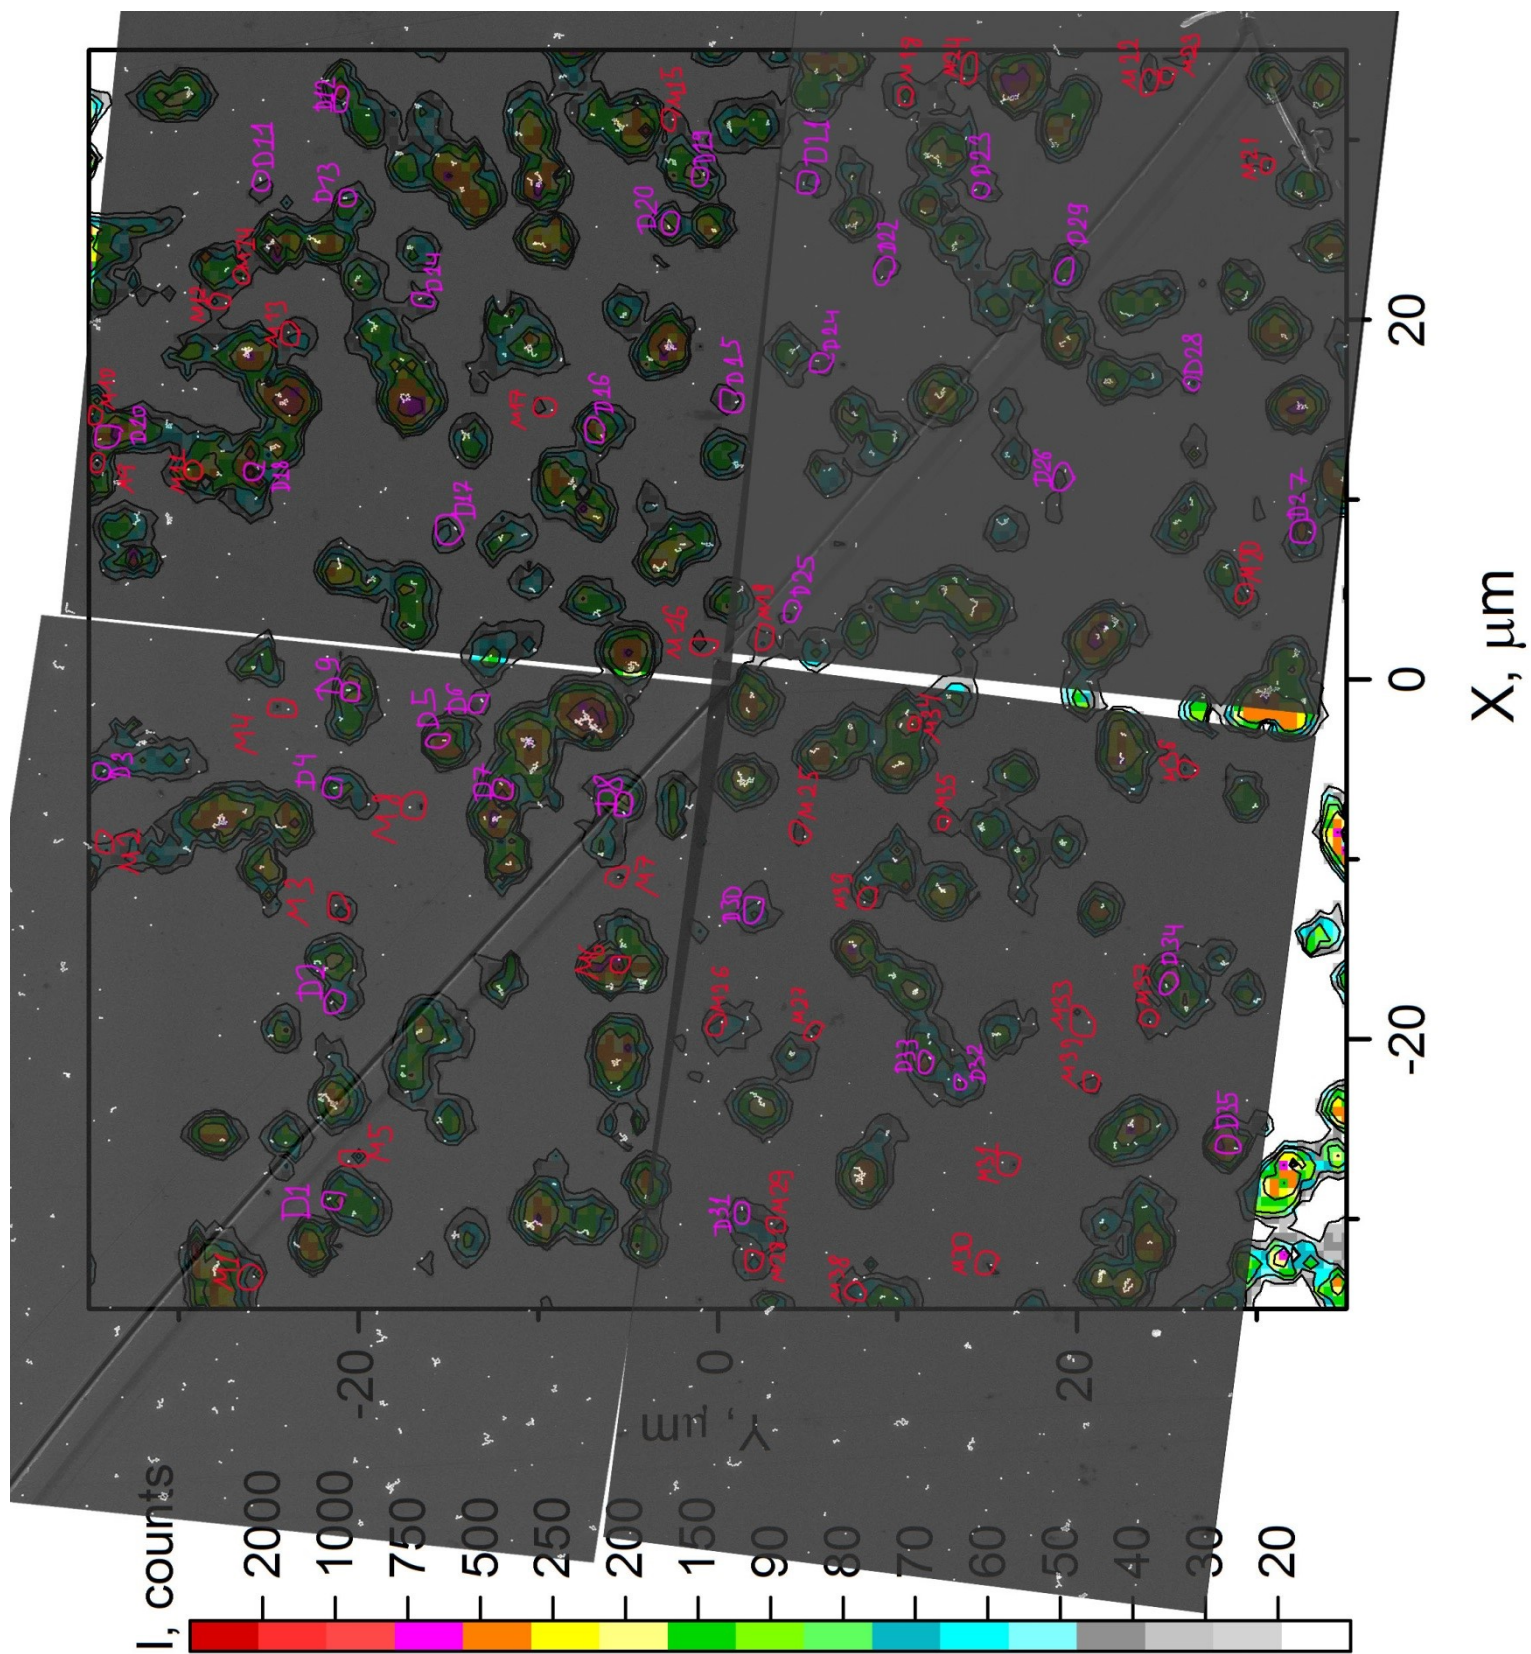

Figure S18. “C8” 100 nm AuNPs modified with mixed SAM of 2-MOTP and 8-Mercaptooctanoic acid (hereafter called just C8 samples) on Ag film

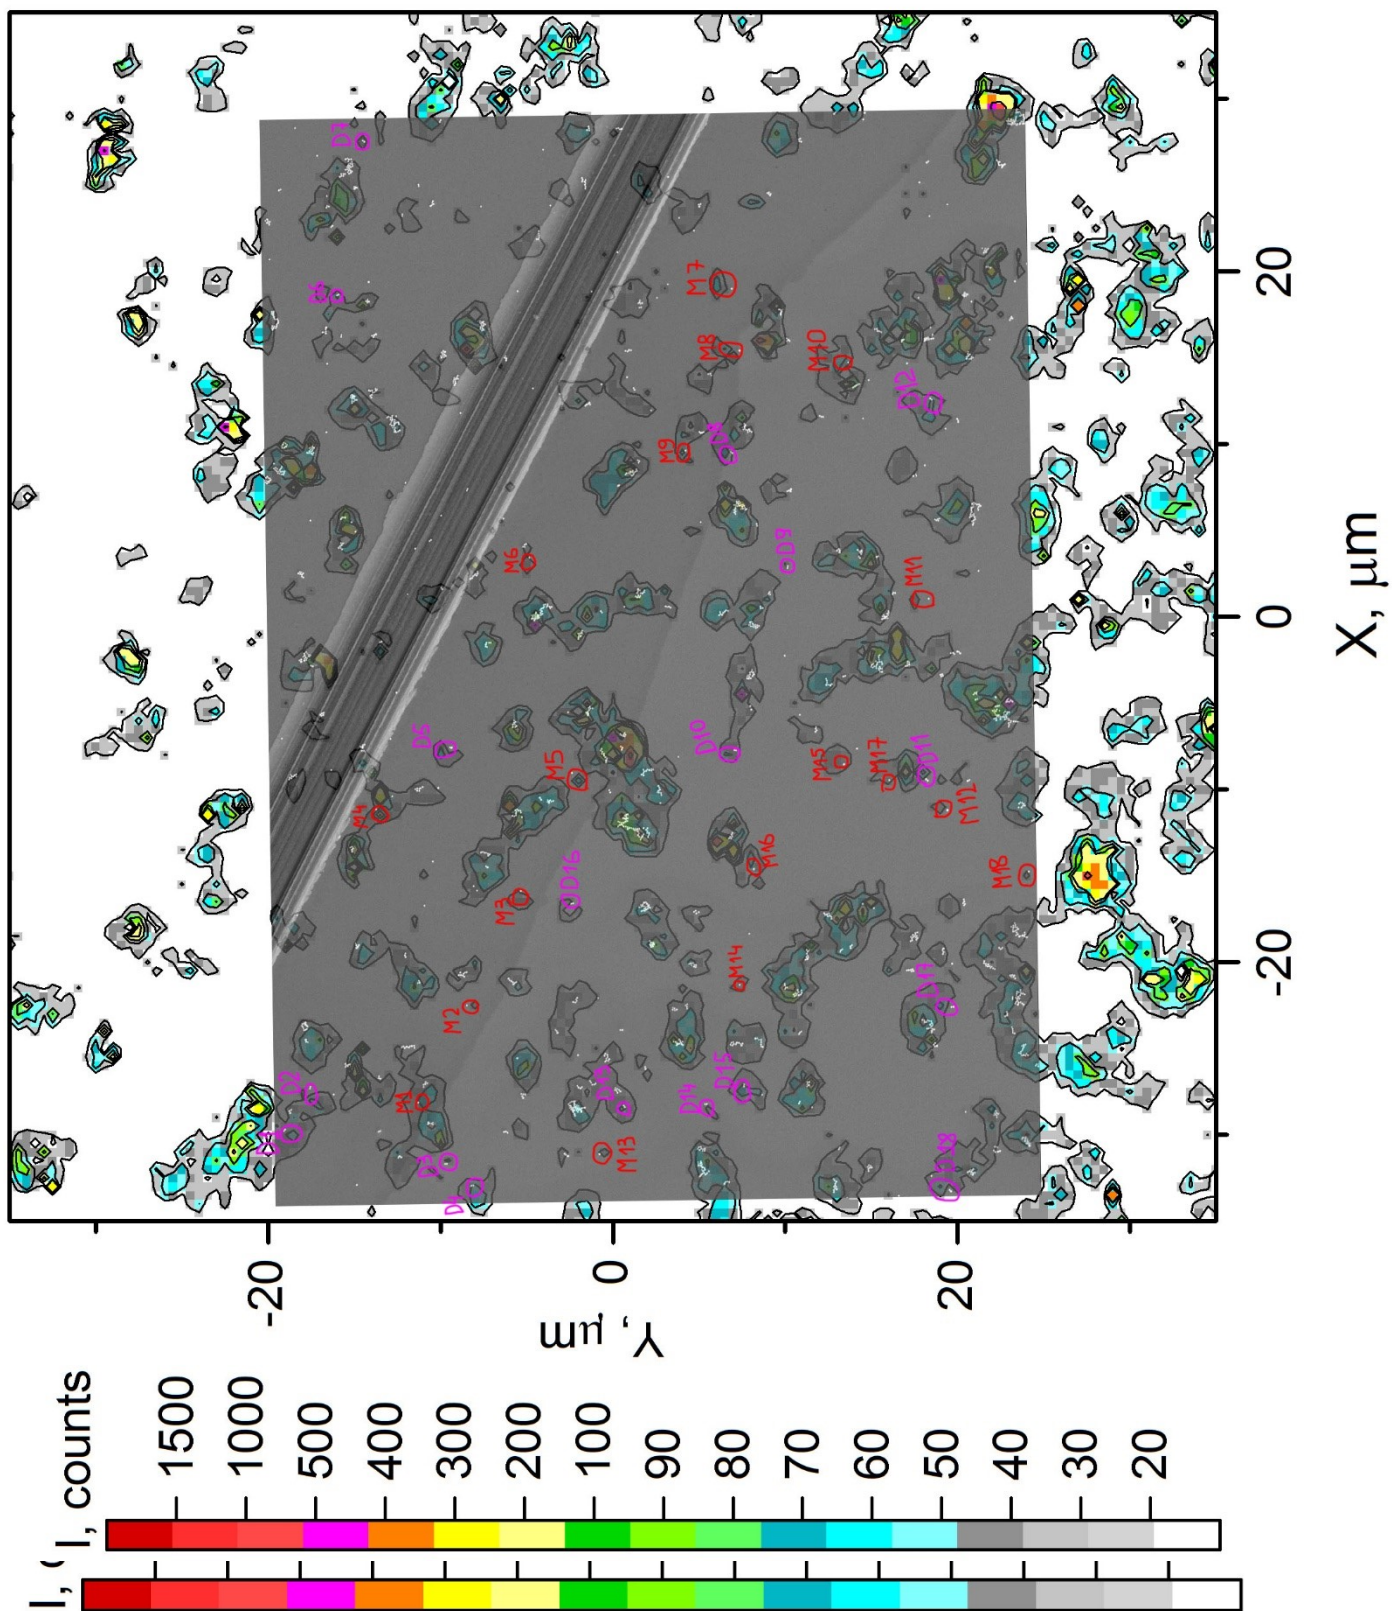

Figure S19. “C12” 100 nm AuNPs modified with mixed SAM of 2-MOTP and 12-Mercaptododecanoic acid - (hereafter called just C12 samples) on Ag film

Figure S20. “C12” 100 nm AuNPs modified with mixed SAM of 2-MOTP and 12-Mercaptododecanoic acid - (hereafter called just C12 samples) on Ag film

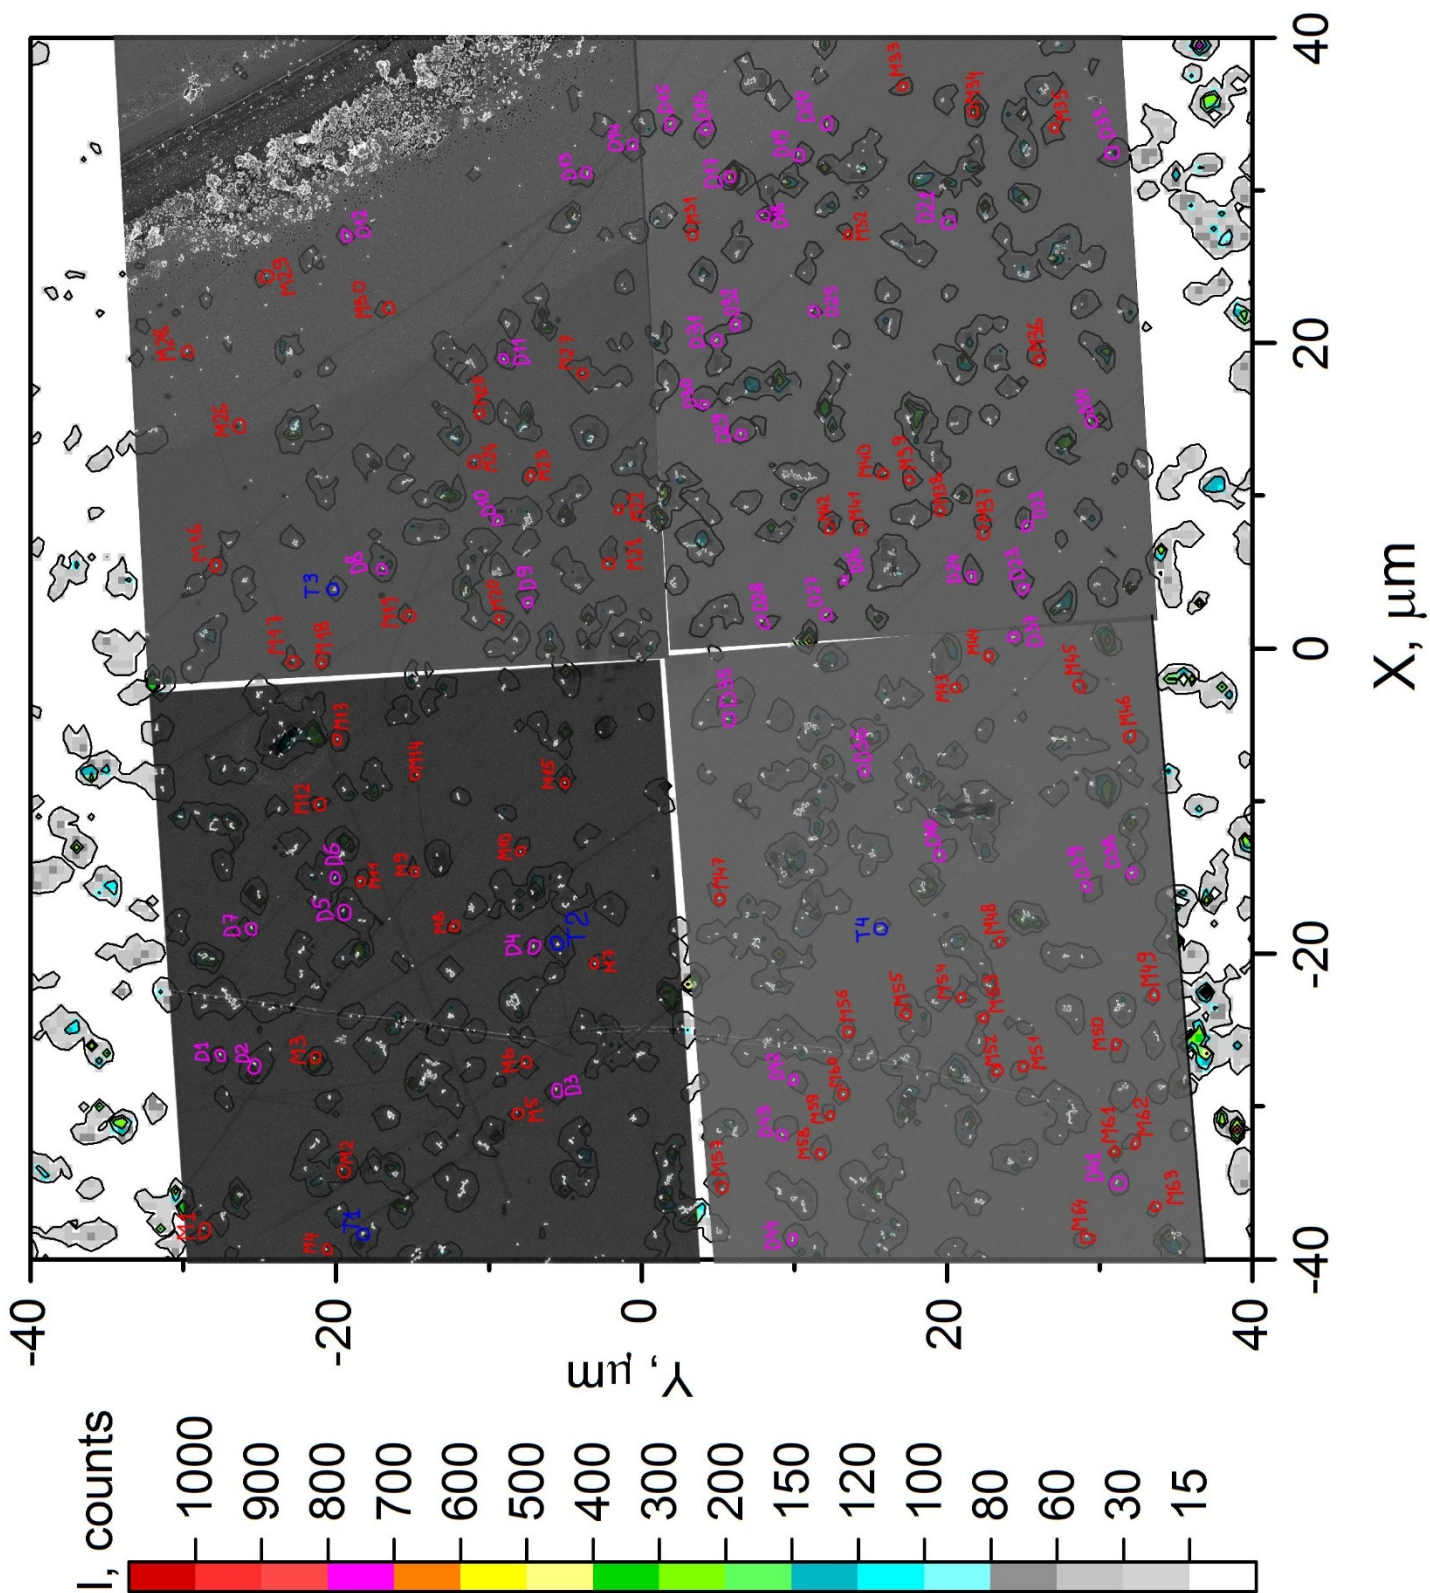

Figure S21. “C16” 100 nm AuNPs modified with mixed SAM of 2-MOTP and 16-Mercaptohexadecanoic acid - (hereafter called C16) on Ag film

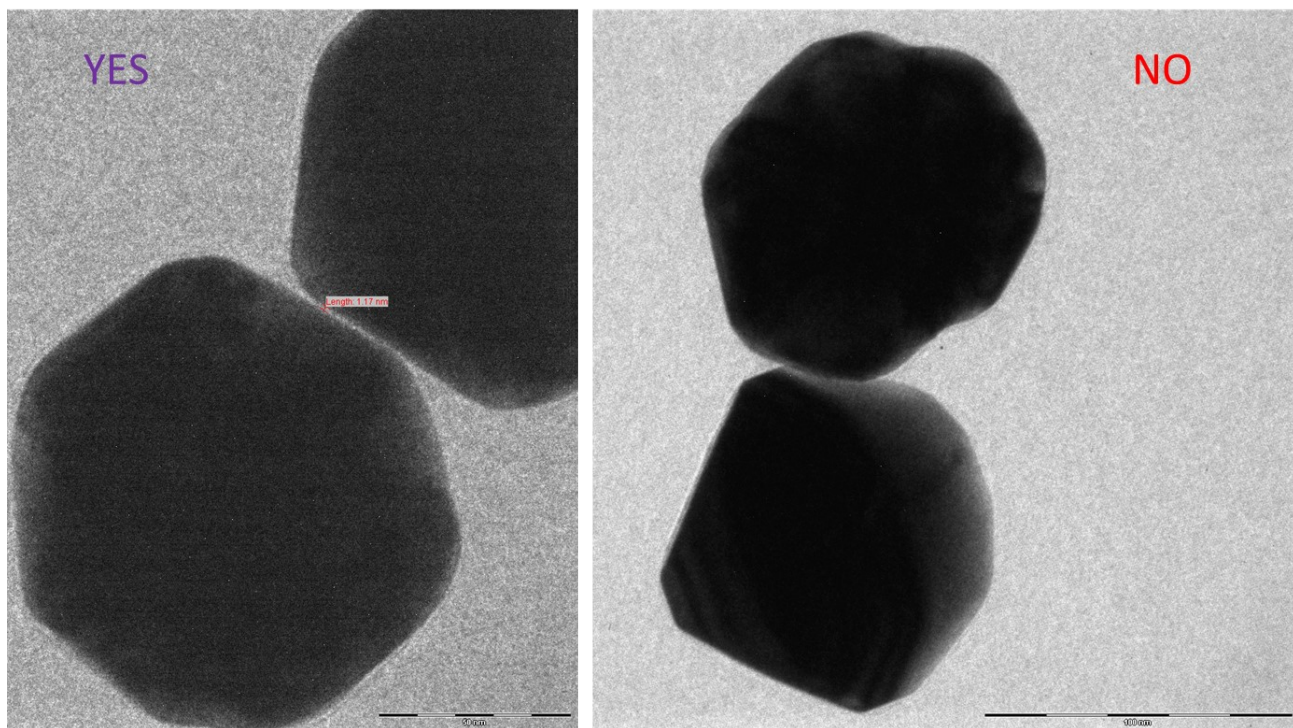

Figure S22 Representative High Resolution SEM Images ( C6 mercapto carboxylic acid modified ) of two dimers that shows clear gap view image , where gap is measured ( left) and tilted/ obscure gap view ( right) where gap cannot be reliably measured. Only clear gap view images were used for calculation of average gap distances.
